# Supplementary material for: Measurements and simulations of microtubule growth imply strong longitudinal interactions and reveal a role for GDP on the elongating end
Source: eLife journal article supplement (doi:10.7554/elife.75931), 2022-04-14

### Figure 2 – Figure Supplement 4

$$k_{\text{on}} = .27 \mu\text{M}^{-1}\text{s}^{-1}$$
$$K_D^{\text{Long}} = 1 \mu\text{M}$$
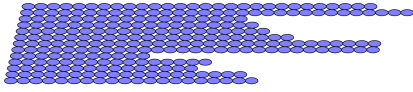
$$k_{\text{on}} = .74 \mu\text{M}^{-1}\text{s}^{-1}$$
$$K_D^{\text{Long}} = 104 \mu\text{M}$$
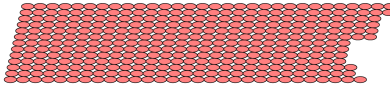
$$k_{\text{on}} = 2.22 \mu\text{M}^{-1}\text{s}^{-1}$$
$$K_D^{\text{Long}} = 14.2 \text{ mM}$$
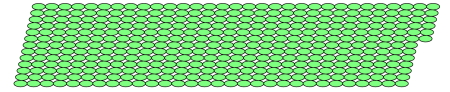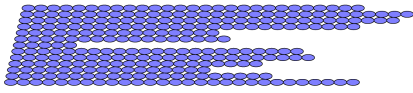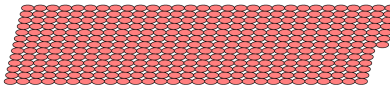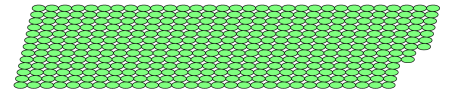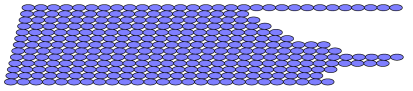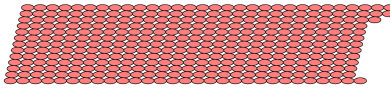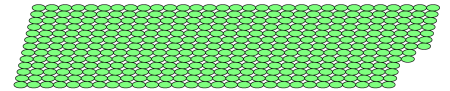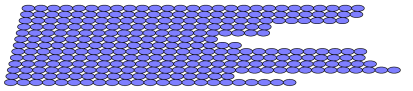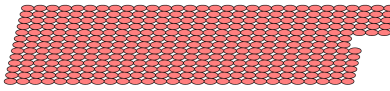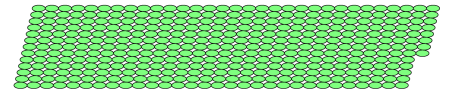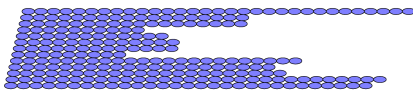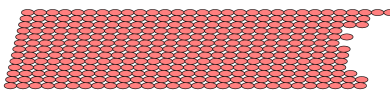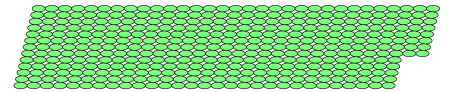

## Best Fit

$$k_{\text{on}} = .74 \mu\text{M}^{-1}\text{s}^{-1}$$
$$K_D^{\text{Long}} = 86 \mu\text{M}$$
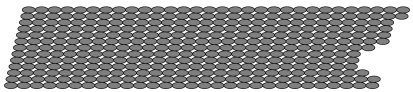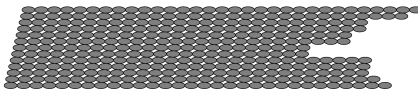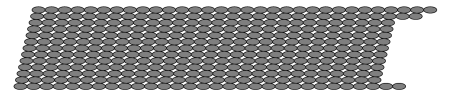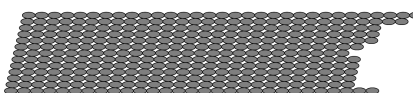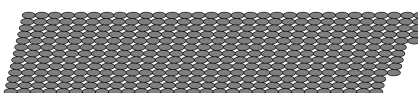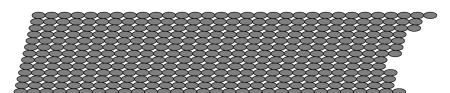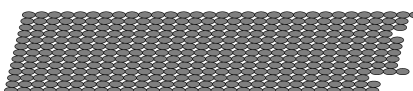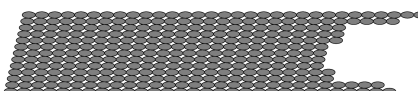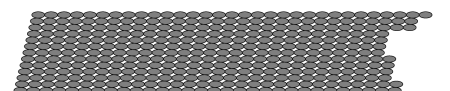

Supplement: supp [file elife_poa_e75931_Figure_2_figure_supplement_4.pdf › elife_poa_e75931_Figure_2_figure_supplement_4.pdf]
