# Supplementary material for: Measurements and simulations of microtubule growth imply strong longitudinal interactions and reveal a role for GDP on the elongating end
Source: eLife. 2022 Apr 14;11:e75931. doi: 10.7554/eLife.75931 (PMC9064298; doi:10.7554/eLife.75931)
Supplement: Figure 1—figure supplement 1—source data 1. [file elife-75931-fig1-figsupp1-data1.xlsx]

## Sheet: Fig. 1 - figure supplement 3
Individual MSD
Tubulin Concentration [μM]	Growth Rate (mean) (nm/s)	Growth Rate (std) (nm/s)	Growth Variance (mean) (nm2/s)	Growth Variance (std) (nm2/s)
0.5	0.61	0.32	5.23	2.45
0.7	1.04	0.49	7.1	4.11
0.9	1.55	0.4	6.63	4.03
1.1	2.01	0.51	7.64	4.44
1.3	2.52	0.2	7.49	4.13
1.5	2.66	0.66	9.06	7.21
Individual MD-Var
Tubulin Concentration [μM]	Growth Rate (mean) (nm/s)	Growth Rate (std) (nm/s)	Growth Variance (mean) (nm2/s)	Growth Variance (std) (nm2/s)
0.5	0.81	0.21	1.97	1.35
0.7	1.22	0.37	2.71	1.87
0.9	1.54	0.35	3.66	1.93
1.1	2.03	0.47	3.22	2.8
1.3	2.45	0.22	3.62	1
1.5	2.6	0.64	4.12	2.01

## Sheet: Fig. 1 - figure supplement 4
The columns below contain the data plotted in Figure 1 - figure supplement 1C						The columns below contain the data plotted in Figure 1 - figure supplement 1AB and summarized in Figure 1 - figure supplement 1D
Input Taper	Measured End					Taper of Simulated and Convolved Blunt Seeds (nm)	Taper of measured taxol-stabilized seeds (nm)	Taper for measured MTs at 1.3 μM tubulin (nm)	Taper for measured MTs at 1.5 μM tubulin (nm)
Taper Size (nm)	σMT (mean) (nm)	σMT (std) (nm)	σMT (SEM) (nm)			109.54	105.82	129.72	194.52
7.2	102.73	13.02	0.01			105.68	118.55	125.49	165.44
52.8	104.66	13.64	0.01			99.16	106.81	125.63	171.81
102	108.52	12.29	0.01			107.04	111.15	134.29	178.09
151.2	114.88	11.56	0.01			103.74	114.31	134.82	148.47
200.4	125.81	11.12	0.01			100.04	104.8	121.61	140.67
249.6	135.95	11.02	0.01			126.48	113.84	127.4	159.74
298.8	146.8	10.49	0.01			89.11	111.94	133.77	128.27
348	161.39	26.95	0.04			112.02	115.64	135.59	133.8
397.2	173.54	10.07	0.01			112.64	116.29	123.8	115.26
446.4	188.84	9.67	0.01			99.09	107.02	128.07	112.57
495.6	203.87	9.48	0.01			82.63	117.03	124.39	115.28
						104.6	120.28	159.11	122.65
						81.66	118.58	152.52	119.07
						88.79	112.48	132.29	108.15
						94.48	107.57	140.15	116.23
						106.52	120.65	137.57	102.51
						111.55	120.88	162.72	102.2
						102.52	116.97	144.74	109.18
						107.11	119.48	160.91	107.76
						107.97	118.35	157.66	97.58
						91.32	110.8	148.33	96.73
						119.59	110.1	131.98	109.38
						108.81	112.51	132.19	111.75
						104.08	107.78	147.23	107.2
						81.44	119.41	140.75	96.75
						103.82	111.37	127.97	88.5
						105.89	114.44	127.79	102.39
						119.31	118.02	118.65	98.37
						90.29	109.84	136.52	113.45
						105.58	131.48	140.93	108.5
						89.49	121.93	135.37	105.38
						141.51	108.29	134.49	105.56
						87.55	123.05	133.89	89.09
						94.7	117.47	129.53	107.03
						98.24	113.82	129.81	106.6
						97.39	110.99	128.14	115.07
						101.21	118.65	119.15	106.03
						97.95	114.01	115.81	107.52
						113.7	113.88	133.45	104.5
						131.88	109.59	121.18	112.9
						103.89	117.89	124.13	117.07
						93.12	107.81	122.42	103.58
						112.63	108.49	111.03	108.31
						97.22	106.59	122.5	107.75
						82.24	116.85	108.39	93.44
						88.05	116.71	106.48	90.56
						81.1	115.25	108.6	105.92
						90.33	107.12	134.2	104.25
						117.03	108.71	134.29	94.71
						75.07	116.17	139.45	95.89
						100.84	111.87	132.34	90.07
						124.44	113.44	143.74	99.12
						95.75	138.31	140	89.8
						101.56	138.94	140.67	91.32
						98.89	116.67	130.81	91.7
						100.43	122.07	153.68	94.54
						105	119.97	147.49	98.21
						84.94	124.1	144.57	94.06
						126.57	128.11	125.55	93.86
						119.33	126.96	137.69	105.04
						114.44	119.21	138.62	89.27
						104.64	126.75	143.38	92.24
						110.4	132.77	128.79	93.04
						99.16	135.52	121.81	99.74
						111.83	130.58	126.94	87.04
						107.13	135.48	121.28	95.04
						112.91	136.36	115.86	90.26
						106.68	119.57	123.69	97.06
						111.72	130.87	127.64	93.88
						94	137.64	121.08	102.08
						88.81	132.76	113.53	100.38
						115.32	194.78	117.4	102.28
						94.77	153.64	115.15	91.48
						93.67	130.65	118.19	102.57
						99.35	137.52	115.42	101.94
						84.73	122.5	111.31	103.35
						102.7	111.92	109.19	104.26
						120.54	124.4	106.91	98.42
						108.79	162.61	102.05	101.99
						118.67	153.42	113.8	106.29
						105.94	138.54	104.68	103.37
						98.06	157.48	103.13	98.75
						95.82	150.42	120.68	104.98
						121.29	128.4	102.99	109.59
						86.89	133.61	111.74	103.66
						105.96	164.28	108	106.66
						88.79	156.82	116.25	98.87
						93	122.73	107.25	109.88
						119.7	125.74	117.22	97.9
						102.27	114.61	113.73	105.08
						118.35	123.44	105.24	110.15
						98.05	120.6	112.85	104.08
						95.69	107.2	106.04	108.99
						103.87	123.22	104.05	110.24
						95.46	123.43	116.27	118.31
						137.1	129.32	127.03	112.86
						107.46	121.47	115.64	112.44
						110.7	123.93	111.24	116.82
						91.77	133.14	107.14	102.24
						103.59	122.38	119.51	110.07
						105.56	130.25	114.9	112.3
						112.79	140.55	114.06	119.24
						102.28	123.26	108.47	126.11
						92.14	120.42	101.49	116.7
						96.27	107.25	119.23	119.85
						102.67	117.66	114.14	115.01
						94.25	126.64	93.6	127.33
						91.97	126.23	106.94	123.17
						110.14	124.34	115.48	118.49
						90.02	154.48	94.63	113.86
						115.95	130.15	94.11	134.42
						136.62	130.17	92.43	124.06
						110.65	136.85	99.75	119.38
						119.24	138.05	91.61	128.41
						98.72	177.67	102.13	127.16
						116.41	137.4	101.02	132.02
						93.66	114.67	95.67	121.48
						104.89	120.17	92.8	123.14
						118.97	125.68	96.51	132.07
						111.03	129.86	113.12	125.58
						111.13	115.04	98.35	119.43
						71.54	110.27	94.65	126.38
						97.22	109.42	105.75	126.02
						106.53	114.13	101.36	117.46
						114.72	117.27	103.84	131.75
						90.44	109.77	108.51	130.84
						86.82	112.91	83.1	127.48
						112.25	117.15	113.15	142.21
						111.34	109.78	98.19	120.23
						92.77	109.49	102.75	129.1
						107.38	122.97	114.83	130.88
						95.61	111.74	126.82	127.27
						112.59	120.13	111.27	123.82
						124.8	112.08	118.15	119.51
						90.96	114.28	111.93	132.36
						116.45	107.98	102.19	140.24
						83.85	111.76	126.01	147.79
						110.15	109.58	96	134.25
						102.9	110.62	110.98	137.65
						95.46	113.26	119.78	129.74
						100.83	113.74	101.91	137.45
						75.7	104.87	113.59	131.53
						109.33	104.04	108.59	137.73
						90.36	104.98	106.65	125.6
						120.66	104.75	104.64	139.03
						101.59	108.32	95.75	129.48
						83.08	100.84	115.12	115.58
						111.34	97.9	98.28	129.5
						105.39	103.72	105.12	112.39
						106	117.14	110.72	112.18
						104.11	114.1	105.37	114.17
						116.15	117.18	108.24	110.24
						100.79	112.44	123.49	106.94
						109.62	113.1	115.38	123.85
						84.67	116.71	116.57	130.24
						94.31	116.1	124.67	124.56
						125.2	111.75	117.6	115.75
						97.26	120.42	123.66	122.03
						76.58	112.22	133.33	126.5
						109.52	103.06	121.52	129.03
						99.21	113.11	121.86	132.24
						82.56	111.34	118	120.32
						98.79	103.23	133.43	114.48
						107.46	115.9	118.69	134.15
						111.82	117.42	124.75	116.54
						104.32	108.14	130.56	121.3
						108.6	105.58	118.72	119.95
						93.01	105.15	132.02	114.92
						95.29	93.65	116.54	139.05
						112.35	119.57	112.48	129.86
						106.68	112.65	124.78	120.47
						95.52	111.83	144.13	122.84
						83.88	98.35	117.23	125.16
						109.39	117.2	138.52	121.75
						105.73	118.38	107.16	119.96
						110.41	103.47	110.44	117.5
						81.22	107.86	130.29	123.15
						101.98	92.8	125.97	117.34
						84.54	115.56	132.53	111.58
						113.43	116.79	107.62	133.43
						95.7	116.66	127.98	118.33
						96.74	117.28	135.78	118.38
						102.04	109.51	135.48	112.44
						80.2	115.71	128.76	116.86
						98.79	99.62	136.45	115.25
						91.11	104.65	148.95	122.1
						94.16	106.14	140.9	123.47
						108.56	109.48	137.92	134.12
						106.6	99.2	127.96	124.6
						91.96	108.33	130.38	138.68
						118.07	124.76	139.88	119.83
						90.4	122.01	171.81	123.94
						70.93	108.97	161.22	122.86
						97.41	104.01	145.03	130.26
						80.62	102.44	150.84	119.79
						97.3	111.18	153.77	131.66
						101.2	123.49	139.93	125.5
						73.28	117.72	157.72	127.76
						96.54	95.9	121.81	123.26
						122.98	98.62	137.17	129.98
						97.55	113.41	144.79	129.45
						101.4	112.7	144.23	134.12
						84.75	116.5	141.98	138.24
						97.6	115.29	149.19	145.31
						85.43	106.26	158.4	149.26
						85.04	94.98	161.85	119.02
						121.38	111.97	182.58	153.61
						106.77	101.47	141.41	152.19
						107.08	106.63	157.36	145.17
						92.42	113.31	165.74	149.44
						100.08	110.4	155.61	137.24
						100.52	118.39	164.93	133.15
						102.75	111.11	186.33	129.89
						106.68	112.58	188.04	139.47
						106.48	107.66	173.72	112.49
						99.94	96.67	185.43	120.51
						116.56	110.17	171.57	121.24
						82.76	111.78	151.49	117.87
						96.37	107.24	153.3	120.51
						119.05	117.84	153.66	104.69
						99.53	109.13	161.73	117.34
						91.98	120.84	145.92	104.41
						107.99	113.79	170.85	104.3
						93.43	114.16	168.39	117.66
						101.47	112.3	147.37	101.49
						124	116	165.28	107.86
						105.64	105.5	191.92	93.62
						118.57	98.89	166.94	104.86
						105.15	109.75	165.48	111.82
						98.08	125.27	166.83	105.95
						104.77	112.57	156.79	105.97
						117.85	115.09	157.77	110.83
						94.67	108.71	146.9	107.95
						114.94	117.02	173	109.04
						104.03	120.67	170.39	109.03
						76.11	113.79	145.67	120.15
						128.22	119.93	141.2	131.53
						94.15	114.65	158.93	120.27
						103.44	123.43	163.13	150.84
						91.47	127.51	175.59	150.35
						102.2	133.97	156.09	127.7
						94.88	125.03	164.96	140.03
						104.22	135.99	173.38	138.27
						124.52	116.1	160.1	135.92
						98.77	138.93	168.14	144.77
						117.17	127	165.54	139.7
						84.56	106.4	146.76	136.78
						90.47	120.39	155.12	145.76
						101.36	118.98	157.91	133.39
						118.58	131.86	181.87	140.04
						101.05	130.3	156.22	130.26
						89.47	126.5	132.05	111.04
						84.63	130.98	143.49	136.39
						87.17	117.04	162.78	130.28
						99.6	114.29	139.13	114.38
						94.6	111.61	154.97	112.13
						107.67	113.1	144.67	96.46
						84.18	113.36	152.11	108.3
						108.12	113.4	147.55	102.41
						120.41	106.86	154.13	101.77
						114.77	104.36	138.25	92.45
						106.31	107.63	158.02	89.75
						113.17	113.16	164.84	90.22
						107.54	108.37	130.12	85.84
						95.83	110.16	144.19	98.83
						91.34	115.71	134.53	101.43
						98.68	99.69	147.33	104.34
						107.26	110.29	121.11	93.54
						91.59	110.67	120.45	96.72
						78.67	103.26	121.04	116.33
						97.31	119.04	134.28	91.62
						99.34	110.85	130.74	105.11
						95.07	108.15	135.89	104.33
						80.08	106.12	129.53	111.1
						98.03	111.86	118.69	110.41
						114.55	117.84	132.53	103.08
						100.53	105.77	134.37	111.67
						105.78	114.22	138.7	105.02
						119.16	122.6	118.99	112.95
						107.13	139.95	112.36	107.07
						96.52	129.88	127.39	112.93
						113.52	118.39	129.43	136.26
						103.99	119.96	133.23	122.64
						103.93	125.64	126.95	121.85
						93.51	121.5	111.35	124.57
						112.8	132.24	122.45	136.36
						106.26	131.44	138.99	131.22
						85.33	130.22	114.49	134.04
						100.47	134	126.82	132.53
						64.05	136.69	133.68	125.44
						100.34	125.79	146.64	128.76
						87.61	147.9	154.96	134.31
						109.56	125.14	144.76	121.38
						108.66	115.96	115.79	124.18
						78.59	114.87	129.89	134.75
						132.48	122.07	121.68	128.83
						97.06	121.34	117.23	121.09
						112.68	110.89	129.44	128.45
						118.53	117.26	110.49	103.56
						102.03	115.22	107.92	116.71
						109.14	112.9	105.29	101.85
						116.28	105.24	100.63	94.3
						102.15	116.88	96.85	97.25
						96.4	105.11	106.36	111.32
						122.68	116.13	107.58	103.54
						98.63	114.97	98.07	96.09
						79.44	114.93	103.05	113.28
						107.34	110.02	94.15	104.96
						94.94	121.66	93.66	114.42
						86.35	110.6	90.1	113.22
						100.13	109.88	109.24	119.35
						116.73	114.91	95.14	104.98
						110.75	118.28	80.52	112.05
						116.38	123.83	101.93	107.2
						96.71	126.07	98.34	115.45
						102.58	121.84	103.09	107.42
						103.08	123.6	104.62	120.33
						111.31	125.29	109.41	120.94
						95.18	106.2	110.17	105.69
						91.86	120.18	109.15	109.29
						84.13	125.84	99.4	111.01
						114.82	114.85	108.48	109.89
						103.71	124.24	133.58	98
						119.33	125.11	114.43	116.44
						84.93	144.92	107.93	113.87
						93.87	145.88	116.08	101.63
						89.73	141.91	118.62	103.4
						129.09	133.81	124.19	110.79
						88.47	134.62	115.59	103.16
						113.08	133.84	122.64	124.36
						103.68	140.31	121.46	103.35
						89.06	134.52	122.99	113.72
						103.96	142.51	120.08	123.81
						99.9	117.89	100.41	116.85
						128.15	118.1	121.95	117.83
						109.09	98.81	122.65	117.41
						98.34	106.35	130.34	111.23
						91.84	107.6	125.55	113.56
						141.26	114.66	122.46	99.6
						106.19	108.43	122.44	112.33
						77.27	117.4	110.63	113.49
						98.07	106.14	114.1	107.11
						91.62	114.99	128.75	114.21
						91.78	122.53	115.81	109.14
						113.33	121.46	106.89	115.15
						75.63	122.02	106.21	119.34
						107.05	124.81	103.01	115.56
						117.24	113.58	118.23	110.48
						85.96	112.95	116.76	103.86
						104.1	114.49	115.58	104.82
						88.33	113.44	117.45	106.41
						108.17	121.02	118.73	109.25
						96.88	111.48	127.88	106.72
						85.62	123.41	126.52	111.51
						114.57	123.14	114.11	110.44
						111.01	114.67	117.69	100.93
						110.37	120.64	118.14	103.08
						97.7	120.66	116.78	98.77
						112.58	111.34	121.65	106.74
						100.24	117.69	126.44	107.76
						94.51	110.73	129.58	118.32
						103.14	119.21	134.51	99.27
						122.99	110.8	143.62	114.62
						96.43	109.92	132	107.16
						116.65	113.23	131.66	107.97
						93.73	115.93	139.24	110.47
						105.12	120.45	121.23	101.29
						112.19	113.69	135.54	100.03
						90.45	105.64	135.21	96.39
						81.89	109.68	129.78	107.54
						105.68	110.01	130.71	113.99
						90.34	109.21	129.49	103.88
						103.23	106.75	131.12	106.19
						112.99	122.36	134.75	107.37
						107.85	103.04	114.66	114.94
						111.22	115.4	134.93	113.95
						120.97	112.51	114.48	100.77
						96.9	111.61	129.11	115.44
						96.42	114.79	136.43	107.48
						125.38	111.71	132.76	110.2
						83.71	112.83	129.49	113.81
						102.46	113.09	130.7	108.37
						88.8	102.18	125.47	101.06
						97.31	106.09	120.26	102.86
						121.24	111.67	128.78	102.21
						97.78	100.84	126.12	88.54
						102.96	113.71	132.08	91.51
						96.04	107.99	129.28	89.09
						93.8	107.15	122.81	97.12
						98.28	102.08	124.62	94.91
						111.62	131.97	141.36	96.4
						129.84	114.11	138.56	92.62
						100.27	110.73	130.15	93.82
						110.25	121.08	139.82	88.15
						97.88	123.88	139.4	82.82
						101.27	122.29	132.8	81.92
						94.61	120.25	155.46	96.51
						118.25	107.94	148.74	99.06
						105.06	130.9	136.05	101.13
						93.18	124.7	129.94	106.97
						81.99	122.33	130.7	101.24
						94.18	114.67	133.84	106.8
						95.52	105.07	136.41	101.63
						88.75	103.72	121.37	113.09
						101.03	100.02	131.59	115.33
						84.03	109.06	140.55	103.93
						111.61	101.53	120.75	112.58
						119.73	95.36	134.17	125.65
						120.63	117.55	141.69	125.77
						113.98	114.99	115.71	129.41
						107.51	113.5	142.22	119.5
						112.73	104.93	159.53	124.66
						101.08	106.11	135.47	120.3
						110.36	99.82	138.38	145.17
						110.66	96.82	141.17	137.1
						96.88	107.52	144.57	131.66
						110.61	107.35	135.38	139.07
						78	108.74	128.16	133.9
						98.62	103.48	129.09	137.41
						100.76	111.91	128.19	148.84
						102.13	101.98	147.64	133.09
						91.03	111.5	136.56	126.03
						96.08	114.44	142.01	137.42
						117.33	101.98	124.94	134.81
						111.67	114.33	139.87	109.67
						99.66	114.9	131.55	129.66
						105.41	101.75	130.46	129.17
						110.55	113.34	126.68	116.75
						112.42	105.61	126.46	98.18
						108.57	114.86	127.54	108.21
						98.59	115.12	130.68	105.69
						104.58	118.12	134.62	100.41
						85.31	112.76	133.81	103.92
						122.67	118.98	143.21	91.69
						119.35	103.47	127.73	105.03
						84.65	124.55	127.68	110.75
						92.97	120.49	141.05	104.92
						81.93	108	127.02	99.08
						103.73	91.76	136.31	113.86
						88.99	123.73	140.98	102.52
						122.66	115.09	119.74	108.12
						87.59	101.74	127.88	108.46
						95.2	97.75	140.99	119.46
						110.06	109.11	112.37	108.93
						107.62	117.07	122.35	127.15
						108.76	117	117.89	136.76
						109.44	110.15	121.98	119.21
						106.86	103.81	122.12	132.76
						97.3	101.05	117.28	131.87
						117.72	98.61	114.93	147.26
						99.08	105.35	110.79	144.29
						110.66	103.46	118.94	151.59
						117.92	102.16	130.27	135.16
						90.78	106.87	128.06	150.36
						79.44	110.11	126.04	151.17
						96.64	94.86	126.83	148.28
						88.31	118.65	106.94	141.25
						90.51	111.5	128.12	166.8
						98.47	114.75	113.97	151.64
						103.67	108.24	111.79	201.31
						108.83	109.51	114.41	150.2
						118.17	116.77	123.92	134.5
						111.39	109.06	119.1	144.59
						96.83	102.86	118	138.32
						92.75	100.37	128.11	127.98
						118.26	98.88	125.78	130.53
						115.64	114.23	118.8	110.17
						90.14	110.94	110	125.65
						83.23	117.49	117.48	119.53
						100.68	112.29	116.95	104.81
						100.21	104.11	140.72	106.04
						120.04	95.19	123.7	106.56
						86.05	98.61	117.94	102.4
						99.07	101.62	120.31	111.92
						93.84	111.01	119.71	108.03
						121.1	110.22	121.38	104.15
						90.8	113.01	134.56	105.16
						107.11	111.59	131.91	98.39
						93.01	104.58	137.29	91.55
						85.89	106.21	104.47	105.04
						107.76	101.48	115.29	111.29
						95.8	111.97	117.12	98.91
						118.66	109.14	104.85	100.2
						118.66	113.38	127.29	102.08
						105.86	98.45	130.29	103.31
						91.38	110.66	111	98.47
						120.65	109.5	121.52	103.93
						110.61	110.78	128.14	96.18
						80.68	95.97	113.72	106.83
						91.16	115.47	117.7	97.13
						85.25	118.98	106.71	99.41
						78.26	111.62	123.93	108.08
						112.72	102.89	103.63	108.19
						77.02	104.98	103.61	110.19
						99.84	102	117.99	111.95
						122.53	102.22	119.04	111.13
						85.55	105.46	121.07	117.68
						97.8	101.37	114.91	122.58
						105.62	101.67	109.18	114.43
						96.23	104.34	118.31	114.68
						97.75	104.44	118.77	129.82
						93.09	109.11	120.57	118.92
						120.21	117.55	128.74	135.6
						119.78	105.58	110.95	129.5
						115.2	110.73	102.54	122.62
						111.71	110.11	126.91	117.28
						109.38	112.66	131.75	122.3
						105.99	106.33	112.28	118.51
						104.45	111.96	114.64	114.09
						94.92	116.17	112.14	113.93
						118.82	116.32	111.43	109.23
						104.16	103.5	104.99	110.38
						109.78	101.75	95.78	104.04
						90.33	123.55	124.88	104.15
						99.91	112.81	110.47	107.56
						118.47	106.22	103.59	102.33
						93.99	102.62	116.93	102.04
						86.69	94.47	117.17	107.17
						105.99	100.35	102.31	108.25
						85.97	107.1	111.43	99.39
						103.07	101.63	119.38	108.24
						106.22	101.78	123.67	104.95
						107.61	105.83	102.68	114.29
						109.88	111.41	110.3	107.13
						99.87	107.1	120.01	106.31
						103.35	104.76	112.78	113
						95.13	102.46	129.08	116.29
						116.09	105.79	120.01	119.39
						88.3	115.47	110.9	109.72
						110.27	104.15	125.59	114.08
						93.04	106.33	114	112.19
						89.9	104.05	127.48	108.55
						128.45	109.36	123.5	116.53
						109.69	111.12	121.06	107.76
						113.27	107.38	116.73	105.92
						106.36	115.47	130.38	96.53
						114.7	111.78	119.22	117.07
						111.06	113.2	121.52	112.49
						103.38	101.28	119.98	102.04
						125.29	89.06	125.78	109.13
						110.25	110.92	143.71	112.81
						113.21	117.06	151.89	110.21
						103.4	99.7	142.45	95.6
						97.3	97.08	137.2	117.83
						98.79	111.3	141.16	106.09
						110.21	110.67	138.49	119.23
						101.32	101.61	134.77	105.94
						96.05	97.19	137.57	108.43
						81.32	112.22	130.77	107.58
						103.59	111.85	126.79	126.76
						91.14	107.71	148.67	116.85
						83.09	109.86	124.91	102.72
						109.91	114.57	118.55	112.51
						103	114.05	113.2	117.33
						115.52	103.81	111.94	113.85
						124.46	98.74	120.44	117.35
						111.65	110.99	117.37	112.26
						108.2	113.66	119.8	117.39
						110.61	100.17	125.4	129.44
						97.65	106.35	126.89	110.77
						103.47	100.16	108.91	121.77
						109.21	104.27	115.91	120.01
						121.17	104.9	126.83	112.21
						103.6	102.05	118.4	119.76
						104.62	114.69	116.89	157.78
						75.53	115.3	105.98	137.67
						103.28	98.03	118.87	129.49
						104.34	115.7	123.49	113.55
						110.05	110.26	114.12	122.19
						86.38	98.61	129.97	118.55
						92.22	106.05	129.95	118.96
						115.12	181.08	135.88	114.7
						120.94	143.49	132.62	105.6
						103.85	135.16	129.57	117.43
						99.06	112.3	138.66	124.57
						103.62	124.58	111.44	117.56
						107.21	127.17	124.82	113.12
						108.02	130.27	130	122.74
						100.51	137.65	116.47	103.82
						107.29	128.92	118.91	102.31
						86.58	139.44	131.75	112.6
						125.69	139.89	124.6	115.19
						105.01	136.41	132.91	97.24
						86.41	122.72	121.79	98.93
						99.21	145.09	132.58	99.42
						72.11	136.06	157.65	105.64
						110.3	136.08	154.23	106.86
						82.89	148.28	143.35	102.55
						114.39	126.12	148.94	119.96
						102.81	97.31	140.91	109.08
						95.4	101.86	133.69	106.1
						105.64	105.87	146.1	118.6
						99.76	106.04	119.9	107.14
						107.96	102.2	133.3	106.75
						111.16	105.81	131.44	99.15
						100.31	106.41	129.37	110.49
						108.28	92.94	134.61	110.69
						132.32	111.6	137.08	116.31
						89.5	96.05	139.84	100.58
						103.12	101.03	135.41	118.5
						110.26	101.1	113.1	119.54
						98.43	108.58	123.2	110.2
						76.99	99.24	128.31	113.04
						99.8	111.02	144.68	126.84
						78.41	94.84	127.79	122.85
						86.7	107.31	132.84	128.77
						97.49	104.16	131.48	122.83
						111.04	106.07	135.64	141.75
						108.9	107.25	121.83	146.58
						99.49	95.87	130.58	124.59
						121.98	102.06	138.91	127.79
						103.03	108.75	124.75	119.49
						88.46	96.29	139.7	127.08
						98.28	107.52	140.8	123.29
						106.1	135.58	140.94	137.86
						90.45	105.4	130.62	123.61
						74.77	103.38	148.17	117.49
						106.01	97.66	132.98	124.3
						95.46	100.84	116.04	126.26
						113.71	102.42	132.69	117.41
						86.87	113.78	126.68	129.97
						97.88	99.75	127.92	115.18
						94.3	92.28	141.27	123.95
						137.91	109.14	135.07	120.03
						92.93	97.07	127.74	110.23
						111.23	111.8	153.69	119.93
						85.32	90.42	127.59	114.43
						80.15	96.41	144.25	112.56
						100.82	107.42	140.65	110.73
						104.21	115.04	135.53	113.53
						113.27	103.41	140.69	126.04
						129.23	105.3	122.59	129.18
						109.43	104.32	113.85	111.15
						88.88	106.4	142.55	121.95
						113.49	105.24	135.44	120.77
						97.97	112.69	133.8	115.73
						92.98	104.47	135.95	107.97
						103.68	105.35	126.38	125.38
						88.94	108.01	154.43	125.79
						89.47	105.47	144.68	114.59
						112.28	93.39	148.76	107.83
						71.37	107.76	152.22	110.88
						101.59	105.23	148.08	99.77
						120.57	86.45	135.01	106.29
						92.74	108.84	174.32	103.82
						109.8	104.34	153.38	108.69
						85.59	103.33	139.6	106.29
						85.74	96.46	122.29	122.89
						87.72	106.81	151.14	112.9
						90.92	111.4	141.14	106.23
						119.77	107.91	158.41	114.38
						110.31	104.26	136.16	117.58
						113	102.15	155.46	115.76
						102.67	104.89	143.94	104.46
						107.68	97.34	157.61	102.75
						88.19	104.42	150.18	110.37
						97.77	104.39	147.37	107.97
						106.6	103.86	135	101.51
						124.2	102.03	138.63	103.38
						96.22	105.54	149.84	110.88
						116.13	100.83	130	114.44
						82.42	109.45	133.98	102.12
						85.08	105.49	119.15	99.83
						115.61	100.23	146.18	116.9
						97.52	98.42	144.64	112.54
						86.21	107.12	128.52	104.97
						105.76	105.72	115.48	110.3
						80.83	102.64	154.43	106.44
						107.76	99.82	146.26	110.18
						113.86	100.35	133.92	106.17
						107.4	98.52	149.36	109.62
						105.94	110.6	117.51	114.63
						112.26	112.7	139.23	113.51
						88.81	99.83	116.6	109.61
						113.09	104.1	126.33	122.35
						108.68	101.68	133.74	107.02
						92.9	97.58	119.24	109.84
						101.04	111.87	121.97	102.44
						85.24	101.04	162.51	105.13
						89.59	105.69	122.72	97.77
						125.35	98.44	146	106.15
						103.31	108.95	133.99	97.24
						102	106.26	138.43	88.66
						109.08	105.75	154.11	95.67
						92.76	109.49	147.3	94.69
						93.85	94.5	147.83	98.65
						95.14	95.18	166.92	92.49
						110.52	102.31	166.02	89.83
						93.28	108.87	156.64	85.05
						104.95	100.67	159.27	88.74
						82.62	102.79	166.31	86.51
						102.47	96.26	152.67	89.46
						94.98	109.14	163.34	93.45
						116.38	99.24	150.89	86.76
						112.06	105.92	156.02	88.96
						81.64	109.33	162.62	95.99
						81.18	105.14	138.36	80.27
						100.55	103.08	132.42	93.53
						106.33	114.62	138.37	80.48
						95.79	97.2	135.29	85.64
						104.44	100.13	146.96	90.23
						97.75	93.48	139.14	91.12
						106.47	97.99	118.87	85.01
						125.43	101.84	118.99	88.58
						120.36	100.85	129.44	81.49
						110.52	103.32	134.84	85.53
						105.33	104.51	118.12	88.39
						116.48	97.66	112.7	91.68
						97.8	100.35	116.58	85.15
						102.03	102.92	116.21	91.27
						110.46	105.93	126.46	84.8
						118.19	102.87	122.83	88.3
						103.26	107.44	124.7	89.51
						70.54	90.63	122.76	90.91
						96.1	103.45	129.66	90.81
						97.68	100.52	119.1	91.63
						109.43	111.83	123.98	90.76
						94.6	100.53	120.28	97.93
						99.14	101.82	121.36	82.4
						117.85	99.17	124.87	94.07
						114.79	105.14	135.98	87.64
						98.43	98.96	127.12	89.75
						114.6	105.86	142.19	82.57
						104.22	101.63	136.12	83.69
						94.44	96.35	145.16	87.83
						121.02	98.09	149.89	92.81
						91.91	103.15	128.51	79.56
						100.07	117.34	160.48	82.76
						95.81	115.51	130.82	85.53
						122.09	103.2	154.88	84.42
						109.84	110.39	135	82.37
						88.1	102.61	150.98	94.89
						99.95	101.33	153.19	87.22
						79.09	98.48	164.35	92.58
						102.03	94.39	152.96	85.78
						89.09	98.15	147.14	91.18
						115.77	108.67	156.94	93.96
						91.53	118.52	141.25	95.1
						93.67	111.33	139.71	100.53
						114.51	101.93	147.21	90.69
						105.01	99.48	142.54	92.84
						95.83	105.71	138.27	87.67
						104.79	105.66	138.27	89.36
						105.92	106.59	130.66	89.87
						105.18	111.72	129.25	84.34
						125.95	111.75	172.88	92.94
						89.18	111.06	127.73	84.99
						112.09	96.19	131.13	93.3
						126.25	100.19	142.29	98.13
						98.62	118.95	125.62	91.78
						84.09	99.01	137.39	97.5
						103.71	102.46	150.58	98.89
						95.78	106.41	138.86	100.37
						95.16	99.85	124.35	96.37
						101.87	102.3	145.21	94.9
						109.34	100.43	132.79	94.81
						112.65	95.89	132.03	93.68
						115.2	106.34	126.5	104.96
						110.27	107.79	134.1	92.68
						103.03	101.05	135.28	95.28
						99.05	96.38	130.54	105.52
						110.07	110.71	126.44	106.22
						106.86	94.17	129.11	104.22
						95.44	104.32	161.71	89.42
						82.44	102.2	163.77	93.92
						117.4	106.23	152.04	100.54
						103.21	92.69	153.89	101.45
						121.99	98.26	194	97.63
						82.74	107.97	183.18	102.56
						116.27	109.29	145.78	104.36
						101.29	104.3	148.1	106.23
						135.9	103.24	152.98	102.02
						98.09	98.27	147.03	102.81
						122.76	103.72	178.17	108.07
						102.26	99.49	166.33	114.79
						83.77	112.95	180.44	123.11
						106.21	102.67	146.94	116.18
						98.39	99.42	161.76	122.34
						116.33	111.09	156.06	125.04
						127.22	101.66	147.16	131.73
						105.03	107.5	162.68	133.49
						84.67	106.51	180.13	120.17
						121.2	111.86	144.02	132.96
						94.36	114.43	139.89	125.66
						82.76	103.92	136.66	118.61
						100.95	104.46	129.58	130.34
						94.94	105.58	144.95	128.61
						90.13	105.04	140.02	133.15
						111.39	108.83	129.72	125.58
						82.49	112.24	129.85	120.85
						98.87	110.31	126.99	129.19
						114.4	108.32	134.6	124.48
						86.05	110.13	122.93	121.8
						120.83	89.68	139.14	115.76
						90.61	116.62	137.4	114.78
						100.41	103.22	140.66	109.39
						87.71	96.36	129.6	119.26
						90.69	112.47	117.93	109.34
						119.01	107.89	132.82	112.74
						116.3	111.61	141.7	117.92
						102.81	95.98	114.79	113.79
						115.92	111.61	150.25	123.32
						105.3	110.06	130.11	107.78
						98.68	98.42	128.86	116.13
						98.11	96.03	145.63	114.58
						92.67	109.41	138.49	113.63
						124.34	101.05	124.32	97.88
						97.29	96.26	158.49	117.66
						103.81	109.37	137.06	103.64
						82.25	102.2	147.17	110.86
						89.42	101.55	141.2	108.64
						113.34	107.92	149.62	118.49
						101.83	100.82	135.02	111.68
						92.8	95	120.69	115.22
						103.46	95.64	142.21	111.01
						95.34	93.71	145.05	124.74
						101.21	93.23	123.19	122.62
						105.81	99.33	120.99	128.38
						109.9	99.42	148.45	119.34
						116.59	98.1	130	111.76
						107.26	106.91	126.89	130.18
						95.57	109.57	174.94	116.83
						105.8	102.25	143.59	120.33
						125.03	101.34	144.08	112.02
						89.54	91.42	146.07	129.23
						118.4	108.34	142.16	131.69
						92.21	101.94	143.88	135.54
						95.63	104.59	131.86	114.55
						134.38	104.81	147.53	110.53
						94.13	104.04	134.71	108.21
						110.11	104.38	137.24	123.77
						100.23	97.64	147.43	106.85
						109.8	102.59	137.53	115.96
						111.44	101.22	127.14	102.12
						104.37	93.96	143.97	94.5
						118.99	105.59	154.79	104.42
						103.54	104.91	142.01	93.38
						126.51	104.63	159.28	113.57
						94.13	98.22	153.77	94.56
						111.83	105.91	128.11	100.4
						113.33	107.25	139.73	112.97
						117.74	109.08	165.77	107.63
						89.59	102.6	149.88	102.12
						85.61	116.38	153.81	119.78
						84.37	109.73	160.73	102.96
						103.51	117.19	164.94	112.18
						109.19	107.05	169.17	129.25
						96.94	108.9	160.56	123.41
						107.79	123.15	149.77	105.52
						92.49	124.41	137.67	106.81
						113.53	126.14	146.84	121.7
						126.47	113.63	150.62	114.74
						115.03	109.25	128.48	109.9
						99.54	109.9	140.59	107.84
						105.47	126.67	146.02	107.18
						110.08	108.86	138.83	98.78
						89.31	114.97	146.28	89.16
						111.87	116.31	139.39	94.92
						107.9	108.49	141.97	90.34
						117.3	109.83	125.99	108.16
						117.43	107.74	115.37	84.81
						74.44	105.97	127.67	90.22
						94.45	102.77	115.19	93.44
						96.52	92.71	115.2	89.57
						102.95	110.51	140.93	88.75
						87.57	107.71	126.22	86.57
						97.38	102.18	122.38	105.27
						113.63	104.9	120.94	97.19
						124.29	103.81	158.82	93.26
						105.79	102.42	137.26	97.49
						117.19	101.75	138.26	87.65
						107.13	101.3	115.76	94.73
						100.73	102.64	138.22	98.75
						112.69	98.79	122.12	91.22
						103.09	99.53	138.09	98.68
						101.71	97.93	122.07	95.31
						84.83	100.3	130.03	92.91
						126.15	97.63	114.48	94.87
						94.6	99.77	122.1	99.97
						92.06	103.26	118.38	102.93
						105.91	102.73	106.08	95.93
						68.75	101.46	120.92	115.31
						102.1	103.54	112.46	96.07
						83.55	100.22	100.06	105.76
						110.46	95.45	140.87	104.56
						102.01	103.53	116.56	107.72
						90.16	100.72	148.5	98.39
						115.6	117.53	123.2	118.61
						110.3	117.33	131.12	117.95
						109.85	104.44	126.99	102.98
						111.89	111.5	102.04	111.69
						115.66	103.96	115.25	114.19
						100.67	113.45	115.02	109.93
						121.86	112.47	133.25	111
						97.92	114.99	116.99	111.9
						100.93	108.31	113.37	98.77
						117.56	107.73	120.36	106.09
						98.75	115.13	133.19	94.34
						84.14	115.28	133.36	94.86
						98.4	111.09	173.16	110.32
						83.3	103.15	167.3	104.92
						90.53	111.74	148.51	104.03
						103.83	102.3	159.77	103.15
						109.11	99.79	178.97	99.51
						112.38	108.53	141.23	96.13
						109.14	111.64	172.4	106.03
						115.6	107.54	190.54	100.75
						87.99	106.84	160.61	97.84
						90.44	97.48	137.62	104.89
						112.66	98.49	161.4	106.01
						109.98	92.59	163.53	108.23
						93.65	100.61	158.13	103.77
						87.77	107.06	159.93	114.5
						109.28	97.74	170.8	88.6
						104.48	96.17	167.95	109.93
						119.79	99.22	173.13	102.58
						85.66	104.8	155.25	108.83
						107.52	111.93	182.3	110.07
						94.63	104.6	172.92	107.41
						137.75	91.94	184.84	109.71
						86.6	106.13	191.85	107.88
						106.47	106.09	196.73	105.01
						96.49	99.38	165.72	107.82
						80.48	102.65	168.94	111.16
						105.33	99.42	166.37	107.76
						110.99	101.52	164.47	117.64
						109.07	96.64	163.6	107.72
						118.3	97.48	162.23	117.72
						95.26	104.24	170.02	112.12
						95.79	102.88	168.83	113.4
						132.54	103.63	183.8	105.56
						97.43	99.67	183.12	115.08
						83.87	105.01	161.27	114.95
						98.45	116.53	165.84	103.75
						83.95	103.91	150.88	116.73
						86.35	114.77	155.45	115.41
						107.13	104.95	154.68	118.94
						79.57	108.86	163.44	105.31
						95.59	118.81	136.02	114.72
						129.01	103.84	170.9	121.64
						87.29	101.62	155.88	113.39
						112.28	113.65	148.88	112.74
						99.78	118.66	167.24	113.05
						92.94	121.41	173.06	116.14
						91.69	109.38	158.18	124.78
						90.8	105.75	152.6	113.93
						128.85	114.48	156.15	114.77
						110.69	109.41	169.03	121.23
						115.17	102.52	147.51	122.15
						100.5	120.91	165.31	128.73
						115.42	101.67	179.04	127.87
						97.97	103.34	172.77	130.89
						93.2	109.78	177.24	131.43
						116.68	99.58	182.22	126.25
						127.34	109.25	176.46	148.66
						97.34	103.63	178.72	131.29
						117.62	108.58	167.71	134.68
						74.13	105.42	174.48	135.55
						84.78	110.62	158.28	133.26
						111.92	111.46	167.18	156.42
						90.85	104.47	175.52	147.71
						89.89	112.43	174.62	138.94
						116.01	96.85	162.82	120.6
						80.11	107.42	158.65	121.61
						87.81	98.09	164.14	125.83
						117.38	105.63	178.54	114.81
						94.79	103.62	181.15	127.77
						112.73	108.03	154.21	130.74
						121.68	100.47	169.74	120.45
						99.44	96.18	167.67	125.16
						108.91	95.12	166.08	139.54
						127.96	105.82	189.13	138.6
						83.69	98.77	149.51	128.14
						113.45	97.35	147.84	134.48
						94.41	105.98	162.62	130.91
						87.73	98.12	156.06	118.9
						139.8	112.65	149.74	138.38
						108.56	105.59	141.91	141.41
						112.79	99.1	147.66	143.69
						84.24	98	146.22	129.89
						98.12	103.06	159.37	147.52
						102.95	108.66	140.38	151.89
						107.66	111.96	133.7	158.45
						128.2	104.67	181.61	161.12
						99.51	108.4	120.52	161.82
						121.27	109.39	143.48	176.74
						94.65	111.52	125.15	164.37
						104.64	113.16	109.18	167.84
						112.49	100.75	129.95	191.97
						112.53	108.01	152.66	197.18
						103.14	97.72	112.12	193.1
						89.27	99.77	110.79	200.31
						87.31	95.19	104.22	211.97
						115.84	90.95	119.4	219.7
						97.45	100.59	121.21	216.37
						94.58	108.83	110.41	227.83
						104.73	106.22	138.2	223.84
						88.34	101.29	117.91	222.29
						115.26	98.99	111.16	215.5
						129.57	118.04	118.48	217.83
						110.24	97.11	102.36	223.45
						112.5	89.21	112.3	223.92
						108.98	88.56	97.41	232.68
						116.06	107.64	100.69	231.42
						101.13	84.48	93.87	225.14
						101.92	78.25	100.43	209.61
						116.96	78.74	96.25	201.72
						110.19	91.05	89.43	198.25
						98.83	83.17	88.22	204.54
						71.65	94.15	109.98	197.3
						108.85	95	95.02	188.84
						96.17	104.99	102.39	207.87
						111.46	94.92	92.08	197.2
						83.97	104.76	89.45	183.34
						93.07	103.49	92.21	181.07
						107.67	104.06	88.29	183.63
						112.67	82.79	88.36	176.05
						97.2	102.07	88.68	190.89
						109.42	105.33	84.86	187.04
						113.91	111.13	92.61	153.39
						95.77	103.53	92.41	166.39
						125.27	110.11	80.92	168.86
						108.1	102.87	94.39	169.26
						112.4	113.77	87.97	175.46
						86.88	104.27	88.81	179.13
						116.67	115.35	75.02	154.92
						96.11	100.18	78.17	165.02
						93.83	105.97	86.33	155.55
						102.22	115.56	91.83	166.96
						81.09	95.87	80.41	161.95
						105.43	123.97	90.19	171.67
						88.51	99.81	80.34	203.69
						128.91	89.62	84.68	200.41
						92.49	96.14	88.92	193.53
						92.24	97.84	87.6	184.16
						115.05	95.26	86.48	187.27
						111.42	86.25	93.14	203.32
						98.75	86.25	87.98	195.4
						111.12	98.58	93.16	209.2
						106.71	98.9	76.18	194.81
						102.88	91.11	79.17	168.37
						125.44	101.42	83.84	151.52
						94.6	96.56	84.13	161.23
						109.03	114.07	85.66	158.61
						127.16	94.65	97.75	139.71
						94.92	98.45	71.8	137.34
						87.34	94.49	83.61	157.15
						101.36	93.24	75.97	150.8
						87.1	98.92	87.93	141.84
						101.27	106.22	75.11	112.69
						98.08	90.52	74.43	132.8
						108.26	106.75	66.08	132.61
						108.4	143.97	67.35	112.01
						112.97	127.48	64.89	113.78
						120.63	93.94	82.03	117.21
						93.58	100.64	70.25	131.64
						107.79	117.09	72.07	110.49
						109.26	115.62	65.94	108.95
						104.42	109.31	65.42	113
						95.25	117.02	70.27	113.9
						77.58	120.37	65.21	105.67
						112.61	107.26	63.44	103.35
						102.3	114.86	75.42	110.8
						110.82	95.54	80.15	119.8
						97.09	103.9	75.57	103.52
						108.74	100.95	71.66	97.92
						82.31	94.78	67.83	108.27
						130.07	127.28	73.35	116.7
						95.85	115.78	93.35	119.6
						97.99	100.73	83.02	99.11
						100.89	141.02	82.36	116.67
						80.77	195.37	95.65	110.28
						99.23	182.49	90.38	97.26
						96.42	197.68	79.73	92.32
						130.84	101.37	84.56	97.67
						108.83	109.38	82.83	103.34
						105.94	111.1	81.52	84.26
						89.38	163.67	75.46	105.16
						120.38	195.76	85.69	96.77
						110.97	198.45	89.59	95.19
						77.77	176.78	82.28	99.06
						92.99	224.88	82.61	80.59
						96	190.13	87.48	89.49
						68.96	215.35	90.22	87
						106.8	237.23	94.04	92.08
						80.12	265.27	85.87	95.04
						99.05	214.43	83.68	97.24
						119.4	215.38	89.53	89.16
						98.99	121.31	82.61	89.42
						102.05	105.29	85.67	81.91
						95.04	97.5	85.71	88.64
						98.05	101.91	76.23	82.93
						83.99	134.63	82.48	82.52
						86.53	120.21	77.58	94.92
						123.7	107.77	96.73	90.21
						102.65	100.92	81.81	84.88
						103.23	101.17	84.83	81.31
						108.56	98.61	84.72	81.73
						98.59	119.59	77	93.33
						102.55	128.83	89.67	84.55
						107.6	122.02	89.12	89.14
						110.33	140.28	83.83	82.17
						119.68	133.51	80.43	98.8
						98.11	136.44	78.67	94.68
						110.41	132.28	87.28	94.63
						84.36	126.55	101.96	97.91
						99.45	141.4	104.36	105.53
						120.68	131.99	104.32	100.16
						101.9	139.27	123.22	103.97
						86.58	120.41	123.49	91.13
						102.17	120.27	123.73	97.09
						93.75	147.53	129.36	96.3
						100.79	138.76	133.99	84.48
						106.4	120.89	112.98	89.03
						105.06	174.99	143.33	81.88
						108.05	128.81	92.78	81.81
						116.32	119.82	88.83	78.11
						90.08	105.1	89.77	75.35
						85.62	85.62	88.34	73.16
						118.83	94.95	97.33	75.75
						86.93	77.52	91.43	75.69
						108.36	85.25	110.85	79.27
						90.36	86.36	107.53	79.48
						92.4	95.87	124.93	79.58
						116.75	115.45	102.23	78.02
						110.91	97.67	110.74	82.35
						116.64	93.64	108.24	79.54
						92.62	103.92	116.07	76.07
						91.25	95.02	120.62	83.46
						105.71	104.45	127.97	75.49
						101.92	102.14	121.53	81.1
						134.34	89.57	124.78	80.09
						102.23	94.69	132.76	86.92
						127.75	103.14	126.7	81.75
						90.08	118.05	143.99	82.52
						100.5	107.72	137.83	90.74
						112.46	89.94	143.24	83.6
						103.88	74.31	145.23	86.06
						91.87	89.93	132.33	90.93
						80.8	84.43	140.95	86.27
						92.22	97.69	136.11	91.1
						100.84	108.63	149.76	91.87
						103.03	88.12	147.43	97.6
						96.59	90.59	155.82	95.06
						104.23	93.77	142.49	111.98
						83.28	107.04	140.4	104.12
						115.61	99.85	135.69	111.85
						125.98	89.83	147.07	109.68
						111.13	83.19	127.79	119.96
						112.3	97.88	127.03	106.88
						106.07	86.16	120.62	113.52
						128.48	86.03	129.2	109.42
						104.58	87.03	111.69	114.5
						111.33	81.42	110.52	107.7
						101.35	84.74	108.51	100.86
						111.44	88.77	140.67	104.41
						106.17	82.93	129.78	88.37
						75.57	85.38	93.9	87.47
						102.49	92.13	133.22	87.03
						96.09	94.38	109.76	98.45
						107.47	99.58	127.1	91.48
						79.72	93.86	127.07	91.58
						97.16	84.65	119.76	86.6
						118.52	81.42	123.02	85.85
						101.12	92.07	126.19	91.29
						92.54	89.91	119.91	97.37
						121.26	90.66	104.64	89.08
						104.29	106.67	132.37	96.95
						98.11	91.66	111.9	90.08
						112.11	87.98	103.74	90.98
						96.54	84.74	112.13	94.76
						108.19	113.2	97.69	103.22
						82.89	98.05	102.97	93.76
						112.03	76.21	108.05	100.63
						98.29	78.14	110.39	99.46
						85.62	99.89	106.34	103.95
						103.1	102	117.48	99.32
						72.53	95.27	117.73	107.2
						108.72	87.18	111.35	114.79
						84.3	89.27	121.34	111.54
						116.1	80.48	89.33	120.75
						103.87	87.53	121.31	118.29
						96.27	88.27	124.13	132.58
						118.86	86.06	127.96	138.11
						105.88	89.02	131.18	138.4
						95.03	87.77	114.55	148.37
						106.24	85.46	113.44	140.7
						108.22	82.85	137.33	143.04
						104.26	80.77	98.39	147.84
						113.14	86.14	112.78	156.59
						79.58	74.56	116.09	169.52
						112.58	78.61	110.4	153.22
						116.49	68.95	109.32	161.24
						100.39	75.93	94.44	172.31
						74.08	84.87	103.32	174.69
						92.91	78.02	97.07	166.41
						88.49	72.41	109.82	170.59
						89.57	85.78	103.87	146.95
						102.93	86.44	93.43	149.07
						110.38	84.05	111.83	72.22
						106.5	84.47	85.86	69.15
						115.2	94.81	78.6	79.47
						112.39	99.3	93.58	74.05
						95.73	96.41	93.68	68.63
						99.49	92.6	94.28	78.54
						114.98	86.72	95.56	69.9
						110.79	92.46	99.95	71.15
						93.67	98.2	91.18	69.92
						88.4	86.88	99.1	82.17
						96.82	102.82	101.42	69.04
						104.15	90	89.65	66.67
						121.09	89.41	83.79	72.31
						87.17	89.78	82.09	75.31
						99.41	94.44	106.23	73.13
						101.33	86.46	91.45	73.55
						116.16	79.61	86.73	83.01
						93.24	84.91	85.54	78.69
						99.97	95.48	83.26	73.75
						89.99	88.23	78.33	68.66
						83.66	87.46	75.24	71.3
						110.72	92.58	80.17	72.91
						106.04	84.57	95.78	72.73
						117.48	85.72	100.94	65.27
						113.94	91.71	81.71	77.76
						105.16	90.62	96.18	67.34
						86.74	95.75	83.84	68.52
						136.5	81.86	94.78	64.28
						103.25	79.77	85.76	68.47
						79.07	80.68	95.03	63.79
						95.82	78.58	86.38	62.91
						86.45	82.56	87.07	65.46
						75.42	90.03	86.85	66.98
						109.49	95.5	68.26	63.73
						75.42	95.4	76.36	72.52
						93.42	104.44	86.61	73.66
						121.4	105.74	79.21	68.29
						97.01	98.23	71.72	78.93
						98.67	96.13	87.56	65.95
						93.6	97.64	79.41	69.54
						104.5	88.72	102.19	71.92
						76.37	90.88	100.6	78.05
						89.5	88.29	86.17	78.32
						123.45	107.03	90.41	65.31
						108.88	98.68	92.86	76.86
						106.77	103.83	90.12	64.03
						103.44	99.21	76.05	63.15
						105.75	110.36	87.74	68.3
						96.3	118.67	101.72	69.12
						101.98	105.81	80.79	71.27
						104.55	92.87	97.64	73.22
						129.59	96.3	81.45	75.25
						90.26	99.07	93.57	76.13
						114.59	90.97	103.42	71.46
						88.3	102.11	81.55	73.14
						93.3	95.06	86.54	74.63
						118.68	90.71	98.4	77.78
						93.05	102.77	90.3	81.71
						93.71	83.52	83.56	63.92
						103.92	96.72	99.99	65.89
						100.25	87.5	119.61	80.6
						93.54	97.86	95.86	64.47
						115.79	90.75	100.4	72.18
						117.01	105.8	108.68	70.38
						112.92	82.03	101.64	68.08
						99.97	92.7	89.2	64.92
						97.15	86.17	86.48	78.49
						110.62	87.75	96.19	77
						113.02	90.89	93.66	72.05
						94.67	91.64	103.06	86.41
						103.78	89.89	97.65	84.63
						95.72	80.35	100.22	80.12
						91.64	80.18	98.22	88.79
						121.81	91.82	98.3	74.18
						98.44	98.36	110.6	82.24
						128.24	98.95	104.76	87.93
						89.1	99.43	108.64	70.89
						110.95	114.26	114.86	86.62
						97.53	104.51	102.62	83.62
						97.41	105.85	110.08	83.05
						126.21	96.71	105.23	87.85
						101.45	108.06	132.21	85.32
						116.45	133.58	128.81	79.49
						92.52	129.93	113.8	89.5
						113.33	117.66	124.83	85.54
						108.51	137.63	135.16	72.59
						110.26	107.97	134.95	76.12
						98.18	127.55	135.55	74.46
						82.98	129.5	145.44	75.52
						90.87	136.9	152.78	70.76
						103.43	135.95	130.59	65.68
						92.6	122.53	149.18	100.4
						97.62	118.82	132.3	72.5
						109.29	130.75	136.21	103.64
						89.01	113.18	138.11	88.4
						115.6	124.22	130.28	93.14
						121.97	99.29	132.91	76.12
						117.57	105.52	141.59	79.84
						120.67	102.88	131.96	97.33
						105.4	119.83	136.26	93.93
						120.48	108.92	130.52	93.1
						93.91	93.76	134.26	79.65
						105.84	95.06	125.7	100.12
						101.31	103.12	128.98	80.94
						109.37	102.89	141.73	95.62
						101.5	97.13	122.25	93.29
						80.38	85.91	134.72	75.44
						99.81	99.07	146.08	93
						97.26	103.46	133.3	85.51
						108.49	104.82	125.53	78.58
						91.55	99.64	133.87	97.33
						104.66	105.54	122.71	95.53
						108.44	111.63	135.93	105.19
						113.15	104.65	112.01	111.87
						100.84	90.13	109.75	120.64
						111.07	106.69	123.39	95.4
						110.27	105.98	117.96	79.65
						92.74	118.48	109.92	96.58
						119.44	116.28	122.22	114.11
						95.42	125.01	126.41	90.61
						103.68	143.12	121.34	103.77
						92	147.51	125.78	90.59
						111.47	131.17	124.59	112.77
						103.01	163.25	109.73	104.65
						77.74	146.85	120.32	135.66
						97.2	113.6	117.48	124.94
						71.85	132.69	122.53	119.99
						105.64	109.87	122.02	89.78
						91.02	133	112.7	130.09
						127.35	134.09	146.24	135.46
						99.73	127.16	130.51	127.8
						89.4	120.47	125.16	141.13
						117.05	164.61	123.27	158.8
						106.21	191.05	138.63	144.55
						107.37	111.04	152.38	154.15
						111.94	88.08	140.43	145.7
						115.13	108.53	156.54	158.24
						112.71	99.05	146.06	146.86
						115.2	99.4	141.09	154.58
						87.15	100.67	136.62	174.64
						109.94	93.83	143.48	138.68
						114.96	86.32	143.31	129.92
						94.74	102.44	136.29	134.67
						77.89	86.36	146.03	144.01
						107.98	110.28	145.79	148.8
						84.19	109.59	134.45	142.15
						90.16	114.1	135.28	142.47
						94.22	96.94	151.65	213.2
						112.11	96.69	127.38	128.72
						112.81	122.8	127.37	122.71
						107.05	96.04	129.6	128.47
						105.22	109.56	134.58	122.4
						114.74	104.63	125	131.32
						85.27	166.6	129.07	106.66
						110.05	115.97	142.08	103.22
						104.31	93.75	127.29	113.51
						95.24	105.8	131.81	120.36
						80	132.1	145.21	113.24
						112.75	138.89	128.88	98.98
						103.23	118.04	160.86	141.74
						131.94	105.04	164.01	139.38
						91.48	104.75	103.88	131.03
						103.29	94.96	146.38	100.27
						89.21	96.91	114.07	98.99
						114.09	83.37	115.64	105.39
						83.69	87.79	107.96	87.43
						108.08	86.17	120.58	74.35
						93.26	103.66	107.56	74.89
						88.55	107.71	108.87	80.67
						114.9	126.07	95.23	63.41
						91.4	113.12	137.66	71.11
						113.05	111.36	99.42	64.9
						122.28	117.89	99.51	63.23
						101.03	114.31	110.04	69.12
						83.19	105.14	107.29	65.49
						102.97	127.8	109.03	64.67
						93.46	103.95	96.38	71.31
						80.26	110.22	109.79	76.8
						92.64	106.3	117.62	75.99
						89.81	109.32	95.96	84.87
						86.76	108.02	105.1	71.01
						117.68	97.5	103.61	71.13
						77.2	85.7	93.23	75.85
						92.45	112.41	109.28	73.48
						140.3	118.76	104.26	76.87
						85.25	95.83	91.07	76.97
						112.48	82.86	100.74	71.75
						91.49	88.99	90.38	84.49
						107.48	89.48	103.86	86.27
						100.22	114.78	98.29	72.37
						87.89	115.77	94.12	79.51
						133.46	91.95	84.04	82.13
						115.54	113.05	107.45	77.8
						108.21	93.92	87.3	69.58
						114.22	101.06	93.91	84.56
						122.04	96.92	75.93	87.06
						105.47	110.76	90.1	75.75
						97.82	114.58	88.36	78.88
						108.81	186.11	80.81	78.09
						119.44	127.04	85.51	85.93
						93.83	150.49	77.6	81.82
						105.57	117.64	72.93	87.19
						82.76	106.26	89.78	83.37
						82.63	121.22	88.36	80.32
						111.5	105.22	87.27	97.3
						105.27	119.34	98.25	89.27
						92.77	131.21	78.97	81.74
						110.13	123.41	94.7	82.99
						89.51	106.68	85.61	86.82
						104.76	119.94	100.02	93.32
						111.28	92.25	97.65	76.85
						93.87	92.32	94.92	82.25
						124.12	87.63	89.27	90.35
						100.05	100.57	96.41	81.93
						100.71	115.28	93.29	86.39
						94.15	87.89	105.32	93.78
						133.45	123.16	92.15	92.69
						80.8	117.54	103.98	91.21
						112.18	125.64	92.29	89.73
						98.44	119.88	111.48	83.7
						97.2	129.86	94.55	87.59
						119.7	113.69	105.71	84.28
						106.7	109.69	93.55	85.68
						97.3	102	102.64	91.54
						97.55	93.28	91.58	81.79
						104.22	105.62	88.73	73.4
						94.5	108.92	94.14	72.91
						103.58	99.53	85.83	68.59
						124.04	101.05	87.31	65.91
						99.72	96.26	89.47	70.11
						118.14	99.76	102.86	66.32
						88.74	100.5	91.84	64.51
						102.82	106.98	77.86	82.07
						115.85	107.19	91	66.19
						122.89	120.83	82.06	73.09
						107.85	110.92	89.59	64.01
						89.94	109.3	92.46	75.22
						91.06	111.3	102	80.82
						95.83	166.34	77.63	75.78
						108.67	160.14	75.5	87.22
						84.11	93.88	85.92	73.25
						115.87	83.88	91.79	82.47
						98.48	130.7	101.06	86.38
						113.39	125.8	108.21	79.95
						116.63	107.81	96.7	71.18
						121.75	88.23	91.92	79.03
						111.77	97.12	102.16	68
						106.77	123.9	106.77	81.32
						105.57	114.59	97.34	62.93
						86.86	124.55	104.34	89.6
						110.66	95.34	104.9	90.24
						109.46	106.29	109.1	87.79
						111.75	99.28	107.72	87.61
						109.02	108.18	117.69	83.56
						76.14	96.04	117.27	74.91
						97.84	95.72	120.6	79.28
						95.42	86.08	110.96	82.49
						130.17	85.56	126.7	95.1
						95.09	99.98	116.86	81.38
						105.86	93.08	111.83	81.32
						115.78	83.13	127.01	87.7
						114.01	95.32	115.62	82.56
						95.71	90.74	116.8	78.23
						115.75	96.51	117.51	88.9
						101.97	105.37	136.41	74.6
						99.71	97.69	128.02	75.8
						114.71	96.35	109.5	79.7
						109.5	95.85	111.76	80.64
						98.16	100.92	109.37	65.69
						91.18	88.74	113.7	68.99
						117.01	95.92	100.08	70.72
						90.38	91.72	109.92	68.12
						83.29	118.25	104.01	64.1
						104.83	101.34	120.27	70.23
						76.9	96.89	119.47	71.53
						102.95	111.35	111.82	69.13
						71.29	93.55	116.44	72.48
						121.92	84.37	124.96	70.07
						104.84	108.92	112.95	72.87
						87.59	102.36	111.86	78.36
						117.05	119.91	119.66	78.96
						106.21	118.79	116.97	93.8
						107.37	87.87	119.36	88.93
						111.94	106.16	113.38	86.16
						115.13	117.81	118.22	93.14
						112.71	90.74	113.13	101.11
						115.2	95.78	115.18	90.72
						87.15	123.42	114.12	82.93
						109.94	115.77	126.53	90.12
						114.96	92.57	120.22	94.45
						94.74	92.2	126.69	97.47
						77.89	85.44	127.72	87.49
						107.98	100.32	129.15	97.83
						84.19	103.06	112.17	93.15
						90.16	115.23	117.49	95.86
						94.22	90.81	118.26	78.63
						112.11	81.49	125.45	78.48
						112.81	91.74	145.79	80.89
						107.05	99.3	130.07	79.39
						105.22	77.3	134	73.85
						114.74	113.8	131.15	71.77
						85.27	111.78	131.19	83.02
						110.05	98.82	119.08	80.82
						104.31	105.65	115.74	65.25
						95.24	113.08	114.11	78.28
						80	109.82	105.5	79.16
						112.75	109.79	112.4	83.13
						103.23	104.16	114.12	85.15
						131.94	101.19	124.07	88
						91.48	96.15	139.6	92.67
						103.29	94.99	121.95	88.41
						89.21	88.39	127.43	91.37
						114.09	97.2	127.49	96.65
						83.69	102.31	118.71	99.65
						108.08	94.71	133.74	83.64
						93.26	107.12	124.85	77.36
						88.55	87.28	127.99	88.73
						114.9	104.07	115.75	81.84
						91.4	104.11	127.8	73.75
						113.05	89.79	137.46	89.5
						122.28	93.11	115.83	77.5
						101.03	102.74	111.83	93.41
						83.19	93.08	124.18	82.29
						102.97	97.43	119.55	89.07
						93.46	102.2	109.42	89.96
						80.26	98.39	129.55	97.93
						92.64	98.4	115.97	89.88
						89.81	90.8	115.44	90.75
						86.76	95.2	114.15	86.55
						117.68	94.45	112.08	74.12
						77.2	97.88	116.08	80.13
						92.45	89.39	116.91	87.22
						140.3	96.01	125.49	83.28
						85.25	97.7	129.89	85.65
						112.48	100.05	132.39	83.25
						91.49	104.86	121.04	79.48
						107.48	90.35	116.72	85.26
						100.22	101.48	121.08	86.07
						87.89	98.67	105.24	72.64
						133.46	107.82	117.09	75.89
						115.54	106.29	103.11	71.14
						108.21	107.03	105.22	68.14
						114.22	101.94	113.15	72.37
						122.04	113.91	106.18	70.37
						105.47	104.01	109.89	75.98
						97.82	109.44	108.71	80.77
						108.81	101.37	111.14	75.86
						119.44	108.41	102.97	78.01
						93.83	99.71	136.58	70.81
						105.57	97.34	112.28	73.82
						82.76	104.99	96.51	71.4
						82.63	99.7	134.25	66.95
						111.5	84.45	133.47	81.74
						105.27	107.27	105.48	77.27
						92.77	100.08	109.11	72.39
						110.13	101.06	120.41	82.52
						89.51	95.74	123.08	74.04
						104.76	106.39	112.84	82.82
						111.28	106.35	96.37	78.81
						93.87	94.7	98	71.91
						124.12	96.77	108.6	70.71
						100.05	94.82	133.44	73.12
						100.71	94.27	109.95	68.16
						94.15	100.8	127.25	78.23
						133.45	96.35	104.6	72.52
						80.8	94.87	118.2	72.76
						112.18	96.6	119.08	88.51
						98.44	99.64	133.84	71.81
						97.2	98.27	112.74	75.24
						119.7	97.66	105.39	81.88
						106.7	94.77	129.3	79.91
						97.3	99.89	117.25	67.86
						97.55	151.3	103.78	64.24
						104.22	169.84	119.22	65.04
						94.5	154.98	121.33	79.45
						103.58	137.35	117.72	68.69
						124.04	117.57	117.65	69.84
						99.72	146.49	108.95	67.08
						118.14	163.33	104.15	68.29
						88.74	155.05	113.67	70.88
						102.82	158.58	114.99	68.3
						115.85	164.82	106.22	75.43
						122.89	175.59	107.03	70.78
						107.85	185.48	107.47	67.35
						89.94	211.66	90.81	71.46
						91.06	154.33	107.85	64.69
						95.83	172.95	132.51	66.2
						108.67	217.76	115.16	66.62
						84.11	194.18	105.49	66.96
						115.87	136.76	109.29	73.42
						98.48	91.73	127.23	63.29
						113.39	107.67	108.97	73.74
						116.63	107.53	87.1	68.76
						121.75	99.09	84.95	74.47
						111.77	101.84	106.9	81.13
						106.77	93.27	93.95	69.16
						105.57	108.1	112.28	74.23
						86.86	105.33	87.77	81.39
						110.66	96.19	77.14	67.97
						109.46	103.85	87.45	84.43
						111.75	104.81	112.11	78.36
						109.02	97.41	143.99	84.45
						76.14	94.22	100.55	73.61
						97.84	118.89	81.82	77.66
						95.42	109.25	110.96	71.18
						130.17	106.48	92.22	87.59
						95.09	103.86	96.48	77.44
						105.86	110.82	101.83	74.91
						115.78	106.59	92.33	78.43
						114.01	99.94	96.39	75.25
						95.71	99.29	86.72	80.11
						115.75	110.46	110.62	79.44
						101.97	118.31	90.37	67.46
						99.71	109.96	100.73	79.47
						114.71	118.3	86.82	67.2
						109.5	137.95	88.43	75.97
						98.16	114.42	120.44	66.88
						91.18	98.93	83.58	67.3
						117.01	94.54	156.23	64.36
						90.38	100.85	123.69	73.79
						83.29	101.73	98.4	77.6
						104.83	101.71	111.45	73.01
						76.9	99.82	168.92	64.36
						102.95	111.3	120.64	87.36
						71.29	112.53	127.27	72.09
						121.92	104.66	109.41	80.37
						104.84	106.62	146.9	74.38
						87.59	126.4	112.62	82.47
						117.05	118.4	141.47	85.6
						106.21	132.06	150.32	81.5
						107.37	122.16	128.2	87.09
						111.94	135.33	117.16	88.04
						115.13	125.07	129.53	86.06
						112.71	119.1	108.52	71.5
						115.2	117.68	111.43	102.28
						87.15	121.81	137.07	87.47
						109.94	121.42	151	99.15
						114.96	116.92	116.57	86.6
						94.74	117	104.16	93.34
						77.89	107.57	132.2	101
						107.98	116.3	166.07	84.25
						84.19	111.76	129.01	85.2
						90.16	104.78	180.23	89.77
						94.22	111.53	110.91	93.66
						112.11	107.7	166.08	91.75
						112.81	108.57	149.02	83.72
						107.05	101.95	195.51	116.97
						105.22	103.35	173.98	102.57
						114.74	101	129.26	96.59
						85.27	105.86	126.73	92.49
						110.05	101.5	97.52	93.64
						104.31	107.15	102.5	84.4
						95.24	96.31	95.02	96.1
						80	112.01	102.09	98.4
						112.75	114.05	194.01	91.89
						103.23	102.48	143.47	79.45
						131.94	113.78	144.09	91.4
						91.48	100.76	191.01	74.12
						103.29	94.16	161.9	84.48
						89.21	113.73	174.13	104.41
						114.09	104.57	172.6	91.3
						83.69	95.45	167.82	86.6
						108.08	94.84	184.1	87.05
						93.26	96.92	160.97	90.16
						88.55	108.74	228.25	88.73
						114.9	99.78	180.37	99.91
						91.4	96.52	216.96	81.97
						113.05	109.82	203.15	95.99
						122.28	106.02	202.79	102.22
						101.03	123.02	171.32	93.08
						83.19	131.43	179.68	102.1
						102.97	110.01	189.17	98.93
						93.46	111.25	179.72	104.02
						80.26	117.53	157.19	101.43
						92.64	121.9	180.46	93.59
						89.81	116.43	161	99.61
						86.76	97.94	190.2	104.05
						117.68	111.62	194.55	86.86
						77.2	100.22	185.52	113.52
						92.45	110.58	176.57	108.94
						140.3	117.47	199.58	117.88
						85.25	108.26	184.86	108.5
						112.48	98.4	202.03	87.67
						91.49	101.72	206.24	106.07
						107.48	106.34	192.52	102.07
						100.22	102.53	190.11	98.01
						87.89	88.26	188.18	107.82
						133.46	95.36	189.41	106.31
						115.54	93.1	182.92	98.64
						108.21	107.28	168.2	111.96
						114.22	102.88	187.47	118.62
						122.04	102.23	190.03	95.57
						105.47	92.7	184.31	110.19
						97.82	92.72	197.08	96.35
						108.81	93.61	189.4	101.69
						119.44	102.18	156.37	103.26
						93.83	90.73	140.82	77.13
						105.57	100.19	155.29	91.14
						82.76	102.33	170.99	97.45
						82.63	88.62	181.56	90.22
						111.5	96.62	165.57	102.33
						105.27	101.56	208.39	102.6
						92.77	94.63	171.1	89.69
						110.13	93.12	211.78	95.86
						89.51	96.09	186.54	97.59
						104.76	95.7	220.67	84.57
						111.28	98.06	196.21	81.71
						93.87	89.51	229.17	84.56
						124.12	100.44	204.85	84.33
						100.05	110.5	183.74	87.02
						100.71	104.95	185.77	71.99
						94.15	99.26	178.55	99.98
						133.45	108.97	138.55	85.56
						80.8	104.95	160.16	80.21
						112.18	103.14	181.63	77.99
						98.44	97.67	169.65	87.33
						97.2	97.01	181.44	85.46
						119.7	100.21	175	88.85
						106.7	92.12	164.72	88.56
						97.3	102.83	153.33	67.92
						97.55	101.97	178.83	91.93
						104.22	98	151.05	98.33
						94.5	103.3	136.96	101.58
						103.58	99.47	196.53	91.5
						124.04	95.55	185.56	87.06
						99.72	89.71	171.08	92.54
						118.14	102.9	143.66	79.66
						88.74	93.95	147.43	87.39
						102.82	86.49	170.06	84.53
						115.85	85.62	140.12	78.46
						122.89	100.74	155.78	86.08
						107.85	89.36	164.57	95.28
						89.94	92.98	159.86	102.71
						91.06	102.86	148.42	90.36
						95.83	90.66	151.48	86.78
						108.67	81.2	139.77	83.83
						84.11	101.24	136.29	91.56
						115.87	96.79	111.17	83.03
						98.48	89.6	135.14	83.77
						113.39	95.44	182.51	72.12
						116.63	94.99	165.7	71.44
						121.75	96.38	128.1	78.99
						111.77	105.79	119.07	75.61
						106.77	93.09	118.4	76.95
						105.57	100.52	86.23	72.21
						86.86	94.65	120.69	63.4
						110.66	101.41	92.89	76.26
						109.46	88.08	78.94	79.22
						111.75	96.4	81.42	77.11
						109.02	95.04	90.69	79.45
						76.14	93	93.67	66.64
						97.84	89.63	92.1	81.68
						95.42	93.53	90.36	65.19
						130.17	110.99	65.71	83.52
						95.09	84.58	70.23	71.81
						105.86	88.86	78.43	75.26
						115.78	97.06	71.8	69.84
						114.01	97.42	68.82	83.61
						95.71	103.12	76.14	72.05
						115.75	92.01	62.91	79.27
						101.97	96.67	65.2	69.29
						99.71	105.99	70.95	79.42
						114.71	93.66	124.16	69.46
						109.5	97.13	73.46	72.47
						98.16	92.19	66.88	72.97
						91.18	92.09	63.63	68.7
						117.01	100.99	64.45	75.98
						90.38	92.41	74.21	72.65
						83.29	95.67	64.19	67.83
						104.83	92.39	64.99	86.88
						76.9	97.38	86.39	78.51
						102.95	85.92	70.46	65.82
						71.29	99.6	86.37	82.16
						121.92	92.01	81.33	73.02
						104.84	94.03	91.82	68.16
						87.59	92.26	63.83	65.48
						117.05	98.97	70.81	64.88
						106.21	87.52	72.95	64.39
						107.37	97.45	68.99	72.76
						111.94	103.17	98.92	69.28
						115.13	97.2	69.69	63.58
						112.71	104.66	76.55	68.87
						115.2	90.18	72.2	63.84
						87.15	94.74	79.46	72.16
						109.94	100.55	85.43	68.62
						114.96	95.91	71.13	78.4
						94.74	92.75	77.86	72.46
						77.89	100.01	69.93	85.03
						107.98	97.5	65.81	75.93
						84.19	96	76.96	69.56
						90.16	111.92	217.44	76.58
						94.22	109.36	274.6	80.4
						112.11	91.98	273.32	72.85
						112.81	116.35	264.99	65.6
						107.05	111.6	243.62	78.16
						105.22	95.61	103.51	66.06
						114.74	110.65	190.72	75.01
						85.27	99.23	191.82	73.59
						110.05	95.09	268.97	79.14
						104.31	95.06	217.29	70.64
						95.24	96.97	242.38	76.46
						80	103.3	293.16	74.59
						112.75	90.26	250.15	75.54
						103.23	91.71	179.55	72.12
						131.94	106.11	247.92	69.7
						91.48	98.34	230.12	69.92
						103.29	86.62	246.68	90.73
						89.21	82.66	221.73	70.45
						114.09	106.12	228.88	70.9
						83.69	89.9	181.65	70.38
						108.08	91.32	269.67	67.25
						93.26	91.4	298.61	71.87
						88.55	97.5	229.17	65.66
						114.9	84.76	250.16	67.99
						91.4	94.53	261.37	73.42
						113.05	89.18	233.31	70.08
						122.28	90.48	272.57	73.29
						101.03	77.67	254.32	66.29
						83.19	83.05	273.29	69.3
						102.97	87.44	257.17	64.67
						93.46	90.87	243.5	74.15
						80.26	103.25	207.51	73.74
						92.64	97.39	243.46	67.96
						89.81	102.62	335.5	74.44
						86.76	106.76	273.21	67.11
						117.68	90.09	292.35	65.02
						77.2	90.89	245.05	81.15
						92.45	87.68	275.97	65.71
						140.3	92.49	241.9	64.02
						85.25	107.06	242.73	70.03
						112.48	99.11	294.71	68.91
						91.49	113.03	310.08	71.73
						107.48	103.09	292.99	83.7
						100.22	98.28	258.47	72.41
						87.89	96.35	242.04	73.35
						133.46	97.37	254	76.86
						115.54	103.76	224.09	70.38
						108.21	99.81	258.33	72.2
						114.22	91.5	262.47	88.38
						122.04	104.03	214.94	74.62
						105.47	95.33	219.8	85.08
						97.82	118.42	199.36	84.96
						108.81	125.61	243.69	82.2
						119.44	122.05	237.96	90.46
						93.83	140.56	207.46	77.41
						105.57	122.93	256.87	76.94
						82.76	127.71	173.37	84.5
						82.63	120.86	251.58	88.52
						111.5	125.91	147.01	85.22
						105.27	134.59	214.37	92.17
						92.77	124.29	281.15	98.69
						110.13	130.89	264.64	85.73
						89.51	131.09	257.53	75.77
						104.76	117.68	263.78	89.32
						111.28	128.12	318.8	88.51
						93.87	130.75	292.74	88.27
						124.12	118.73	281.99	91.31
						100.05	113.48	341.19	82.52
						100.71	116.85	330.79	74.79
						94.15	107.32	378.4	80.79
						133.45	112.36	338.28	88.23
						80.8	115.43	443.6	72.71
						112.18	107.65	386.98	89.56
						98.44	103.55	448.44	77.17
						97.2	111.4	451.83	77.08
						119.7	98.4	495.42	74.1
						106.7	103.34	491.31	85.64
						97.3	98.73	483.1	87.58
						97.55	94.63	469.37	79.04
						104.22	94.06	405.86	91.65
						94.5	91.74	338.29	91.56
						103.58	80.27	430.1	91.82
						124.04	97.68	412.45	83.44
						99.72	86.69	425.53	98.57
						118.14	91.62	379.24	102.83
						88.74	94.16	330.59	85.32
						102.82	97.19	420.72	88.98
						115.85	83.88	310.18	83.06
						122.89	88.69	419.24	91.08
						107.85	84.95	355.46	77.47
						89.94	95.72	317.41	89.06
						91.06	85.04	205.28	82.25
						95.83	91.38	233.5	102.03
						108.67	84.85	218.31	82.15
						84.11	97.71	274.41	87.77
						115.87	96.83	244.96	100.94
						98.48	110.59	215.04	81
						113.39	105.79	184.2	92.17
						116.63	111.55	274.78	102.01
						121.75	113.7	317.24	101.83
						111.77	117.46	241.65	95.97
						106.77	139.61	257.98	109.48
						105.57	128.15	237.66	91.47
						86.86	121.02	306.42	98.02
						110.66	135.26	259.74	98.81
						109.46	132.14	243.9	95.87
						111.75	121.37	230.53	95.33
						109.02	117.54	193.84	95
						76.14	122.98	213.56	84.72
						97.84	135.26	322.41	86.72
						95.42	125.05	258.87	79.64
						130.17	126.52	274.82	85.27
						95.09	134.35	223.76	83.98
						105.86	106.93	217.65	81.94
						115.78	122.44	257.71	76.67
						114.01	111	261.72	76.91
						95.71	110.12	241.25	80.55
						115.75	115.51	225.69	69.36
						101.97	98.16	214.45	69.46
						99.71	129.37	265.38	74.73
						114.71	112.22	254.18	70.16
						109.5	97.62	396.16	69.9
						98.16	113.68	356.47	73.72
						91.18	96.58	309.32	73.21
						117.01	102.37	222.68	67.5
						90.38	89.17	235.53	79.64
						83.29	90.37	283.17	68.42
						104.83	109.34	265.36	77.48
						76.9	97.54	238.72	77.84
						102.95	100.18	218.15	71.28
						71.29	87.35	263.48	65.59
						121.92	90.4	266.46	70.07
						104.84	95.21	230.62	76.13
						87.59	99.75	226.9	88.16
						117.05	101.42	276.59	92.23
						106.21	103.65	212.68	81.79
						107.37	100.2	297.69	92.35
						111.94	92.65	221.22	79.2
						115.13	106.23	226.52	87.48
						112.71	88.09	223.31	94.62
						115.2	83.07	273.64	93.23
						87.15	98.67	261.7	82.14
						109.94	105.53	326.76	91.53
						114.96	115.61	311.9	109.58
						94.74	105.74	289.86	92.67
						77.89	110.83	323.94	94.47
						107.98	116.31	229.88	96.02
						84.19	129.05	223.77	87.19
						90.16	126.76	292.78	78.91
						94.22	136.06	251.16	72.01
						112.11	137.38	269.64	82.51
						112.81	141.78	212.74	80.24
						107.05	131.45	287.35	63.96
						105.22	128.32	209.48	62.57
						114.74	128.73	292.58	67.2
						85.27	112.45	261.19	68.95
						110.05	127.5	257.34	66.03
						104.31	127.8	278.47	71.31
						95.24	111.73	225.47	73.1
						80	109.9	374.26	65.67
						112.75	114.49	359.69	75.17
						103.23	105.26	234.64	79.63
						131.94	105.65	348.04	66.86
						91.48	109.11	247.21	64.22
						103.29	92.78	297.15	70.19
						89.21	109.14	331.41	72.53
						114.09	106.19	409.24	73.66
						83.69	106.66	275.53	78.14
						108.08	105.05	284.56	72.58
						93.26	102.06	289.37	84.79
						88.55	105.65	249.35	73.58
						114.9	105.25	310.26	73.22
						91.4	108.83	231.79	77.09
						113.05	97.27	262.72	66.29
						122.28	94.38	243.36	78.8
						101.03	99.3	277.18	76.53
						83.19	92.89	278.21	90.38
						102.97	102.91	278.17	70.36
						93.46	99.03	253.28	65.94
						80.26	103.15	220.86	67.4
						92.64	110.75	230.1	67.18
						89.81	99.63	267.08	69.31
						86.76	99.83	300.31	66.46
						117.68	99	216.13	63.37
						77.2	106.46	197.89	62.71
						92.45	106.92	206.52	69.78
						140.3	99.54	246.24	62.57
						85.25	104.14	238.6	145.18
						112.48	107.91	257.03	248.62
						91.49	123.91	207.88	156.55
						107.48	115.28	224.25	208.94
						100.22	129.43	225.69	241.59
						87.89	112.79	270.23	168.21
						133.46	132.72	220.26	145.56
						115.54	120.87	227.13	213.39
						108.21	135.36	200.37	193.87
						114.22	124.79	193.97	194.78
						122.04	121.69	252.29	177.96
						105.47	127.43	230.35	199.92
						97.82	122.36	230.43	210.84
						108.81	124.83	255.27	184.06
						119.44	122.65	230.3	183.74
						93.83	118.14	277.16	210.33
						105.57	117.34	213.9	193.66
						82.76	120.37	214.02	204.32
						82.63	133.48	206.58	225.99
						111.5	111.96	207.38	197.63
						105.27	116.92	208.34	212.36
[truncated: 26,259 more rows]
