# Supplementary material for: Measurements and simulations of microtubule growth imply strong longitudinal interactions and reveal a role for GDP on the elongating end
Source: eLife. 2022 Apr 14;11:e75931. doi: 10.7554/eLife.75931 (PMC9064298; doi:10.7554/eLife.75931)
Supplement: Figure 1—source data 1. [file elife-75931-fig1-data1.xlsx]

## Sheet: Fig. 1CE
Tubulin Concentration [μM]	Growth Rate (mean) (nm/s)	Growth Rate (std) (nm/s)	Growth Rate (SEM) (nm/s)	Growth Variance (mean) (nm2/s)	Growth Variance (std) (nm2/s)	Growth Variance (SEM) (nm2/s)
0.5	0.81	0.21	0.05	1.97	1.35	0.29
0.7	1.22	0.37	0.05	2.71	1.87	0.24
0.9	1.54	0.35	0.09	3.66	1.93	0.48
1.1	2.03	0.47	0.07	3.22	2.8	0.39
1.3	2.45	0.22	0.07	3.62	1	0.33
1.5	2.6	0.64	0.13	4.12	2.01	0.42
Taxol-Stabilized Seeds	0.01	0.06	0.002	0.97	0.92	0.04
