# Supplementary material for: Measurements and simulations of microtubule growth imply strong longitudinal interactions and reveal a role for GDP on the elongating end
Source: eLife. 2022 Apr 14;11:e75931. doi: 10.7554/eLife.75931 (PMC9064298; doi:10.7554/eLife.75931)
Supplement: Figure 2—source data 1. [file elife-75931-fig2-data1.xlsx]

## Sheet: Fig. 2D
kon (μM-1s-1)	Growth Variance (nm2/s)
	[tubulun] = 0.5 μM	[tubulun] = 0.7 μM	[tubulun] = 0.9 μM	[tubulun] = 1.1 μM	[tubulun] = 1.3 μM	[tubulun] = 1.5 μM
0.27	0.28669	0.41562	0.53824	0.57703	0.78494	0.88943
0.3	0.2786	0.43432	0.52907	0.74172	0.83462	0.9135
0.36	0.30582	0.44527	0.66744	0.7939	1.0037	1.1336
0.43	0.34813	0.56149	0.79751	0.95499	1.3159	1.4634
0.51	0.41163	0.71273	1.0778	1.648	1.7799	2.1012
0.62	0.42219	0.78175	1.2852	1.787	2.0853	2.7882
0.74	0.41989	0.83411	1.3919	1.8563	2.6281	3.1582
0.89	0.45375	0.848	1.3772	2.1877	2.7033	3.5054
1.07	0.40903	0.72402	1.1566	1.7836	2.5414	3.1323
1.28	0.38006	0.69634	1.1205	1.4848	2.0345	2.5854
1.54	0.35478	0.60035	0.95199	1.4943	1.7341	2.411
1.85	0.3583	0.61308	0.82099	1.1997	1.4909	1.8336
2.22	0.30889	0.56383	0.69196	0.99486	1.2723	1.5274

## Sheet: Fig. 2E
tubulin concentration (μM)	Growth Variance (nm2/s)				SD of Growth Variance (nm2/s)
	kon = 0.27 μM-1s-1	kon = 0.74 μM-1s-1	kon = 2.22 μM-1s-1		kon = 0.27 μM-1s-1	kon = 0.74 μM-1s-1	kon = 2.22 μM-1s-1
0.5	1.257	1.39	1.279		0.0152	0.0224	0.0124
0.7	1.386	1.804	1.534		0.021	0.0329	0.0209
0.9	1.508	2.362	1.662		0.0264	0.0516	0.0174
1.1	1.547	2.826	1.965		0.016	0.0801	0.0516
1.3	1.755	3.598	2.242		0.0242	0.1314	0.0554
1.5	1.86	4.128	2.497		0.0422	0.1292	0.0377

## Sheet: Fig. 2F
tubulin concentration (μM)	Growth rate (nm/s)	SD of Growth rate (nm/s)	Growth variance (nm2/s)	SD of Growth variance (nm2/s)
0.5	0.614	0.0607	1.458	0.0264
0.7	0.999	0.0715	1.858	0.0245
0.9	1.472	0.0922	2.392	0.0633
1.1	1.984	0.1122	3.14	0.1048
1.3	2.524	0.1491	3.743	0.1348
1.5	3.031	0.1498	4.169	0.1508
