# Supplementary material for: Measurements and simulations of microtubule growth imply strong longitudinal interactions and reveal a role for GDP on the elongating end
Source: eLife. 2022 Apr 14;11:e75931. doi: 10.7554/eLife.75931 (PMC9064298; doi:10.7554/eLife.75931)
Supplement: Figure 4—figure supplement 1—source data 1. [file elife-75931-fig4-figsupp1-data1.xlsx]

## Sheet: Fig. 4 - figure supplement 1C
tub	V	D
7.5	4.2804	4.10078
10	7.41075	6.5946
12.5	10.9347	9.6645
15	14.7784	14.6218
17.5	18.9605	18.0063
