# Supplementary material for: Measurements and simulations of microtubule growth imply strong longitudinal interactions and reveal a role for GDP on the elongating end
Source: eLife. 2022 Apr 14;11:e75931. doi: 10.7554/eLife.75931 (PMC9064298; doi:10.7554/eLife.75931)
Supplement: Figure 4—source data 1. [file elife-75931-fig4-data1.xlsx]

## Sheet: Fig. 4AB
tubulin concentration (μM)	Growth rate (nm/s)	SD of Growth rate (nm/s)	Growth Variance (nm2/s)	SD of Growth Variance (nm2/s)
7.5	4.1946	0.1512	4.711	0.1359
10	7.3228	0.1847	6.6378	0.1382
12.5	10.793	0.2074	10.365	0.2434
15	14.846	0.2626	12.654	0.82
17.5	19.144	0.2649	16.106	0.4929

## Sheet: Fig. 4D
kGTPase (s-1)	Growth rate (nm/s)	Growth Variance (nm2/s)
0	10.796	10.039
0.005	10.749	10.317
0.01	10.642	10.924
0.015	10.579	10.796
0.02	10.445	11.575
0.025	10.332	12.515
0.03	10.246	12.849
0.035	10.08	14.022
0.04	10.014	15.068
0.045	9.8454	16.623
0.05	9.6906	18.198
0.055	9.538	20.08
0.06	9.3064	23.185
0.065	9.2124	24.404
0.07	8.9971	26.701
0.075	8.8466	29.964
0.08	8.5746	32.502
0.085	8.5336	31.608
0.09	8.3727	33.118
0.095	8.2768	36.289
0.1	8.1783	35.37

## Sheet: Fig. 4F
<nGDP>	Fold change in Growth Rate	Fold change in Growth Variance
0	1	1
0.020919	0.992537	1.01881
0.044304	0.986308	1.04638
0.072296	0.976881	1.1606
0.10067	0.966556	1.21192
0.13271	0.95842	1.26217
0.1674	0.948993	1.34045
0.21759	0.936536	1.48467
0.26232	0.922339	1.55682
0.30373	0.913361	1.70029
0.36421	0.896695	1.9209
0.42907	0.880871	2.12644
0.49622	0.867628	2.35124
0.58701	0.842714	2.81162
0.62716	0.833567	2.80475
0.69723	0.819314	3.11825
0.7747	0.79844	3.58958
0.80958	0.786039	3.64975
0.88442	0.765445	3.98843
0.86404	0.760507	3.94806
0.90875	0.744571	3.89834
