# Supplementary material for: Measurements and simulations of microtubule growth imply strong longitudinal interactions and reveal a role for GDP on the elongating end
Source: eLife journal article supplement (doi:10.7554/elife.75931), 2022-04-14
Supplement: supp [file elife_poa_e75931_Figure_2_figure_supplement_1.pdf › elife_poa_e75931_Figure_2_figure_supplement_1.pdf]

## Figure 2 – Figure Supplement 1

**A**

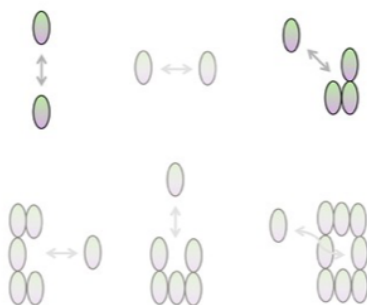

**B**

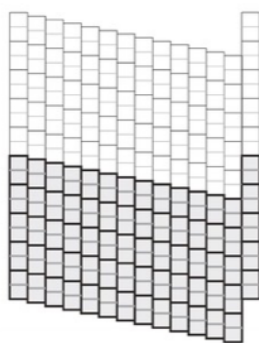

Initial conditions:

- + template 'seed'
- + 13 possible association events

Then simulate MT dynamics one biochemical event at a time. The relative probability of different events are determined from the characteristic rates or rate constants

**C**

Simulation algorithm:

0. Start at time  $T = 0$  s
1. determine 'execution time' for possible events.
2. Implement the event with the shortest execution time  $\Delta T_{\text{fastest}}$ 
  - = Advance simulation time:  $T \rightarrow T + \Delta T_{\text{fastest}}$
  - = Add new events and remove old events in response to the event that just occurred
3. GOTO 1

**D**

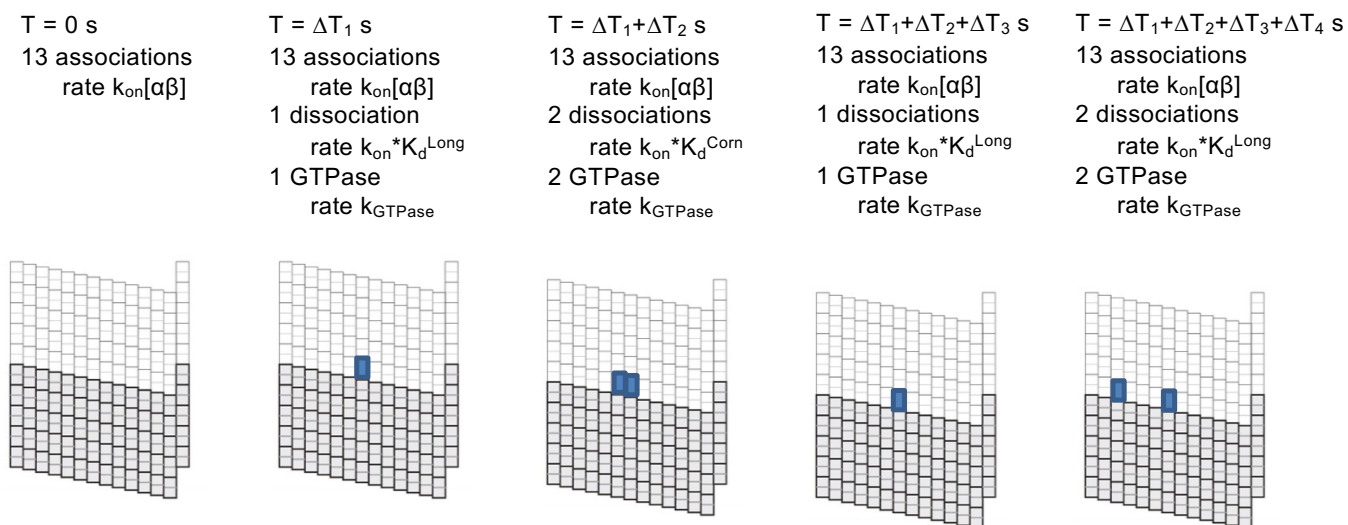

**E**

Results of the simulation:

- +  $N_{\alpha\beta}$  (number of tubulins in the microtubule) as a function of time
- + biochemical state (GTP/GDP) and environment (neighbors) for every tubulin

Comparing to experimental data:

- + Convert to length units to obtain growth rate
- + Analyze simulated growth rates and fluctuations as for experiments
- + Adjust model parameters to obtain best agreement between simulation and experiment
