# Supplementary material for: Measurements and simulations of microtubule growth imply strong longitudinal interactions and reveal a role for GDP on the elongating end
Source: eLife journal article supplement (doi:10.7554/elife.75931), 2022-04-14

Figure 4 – Figure Supplement 1

A

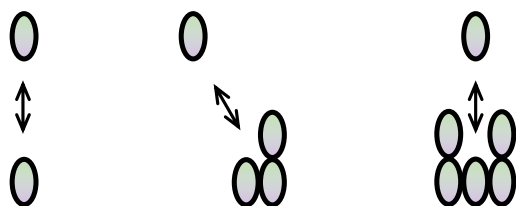

B

Site-independent association rate:

$$k_{\text{on}}^{\text{Long}} = k_{\text{on}}^{\text{Corner}} = k_{\text{on}}^{\text{Bucket}}$$

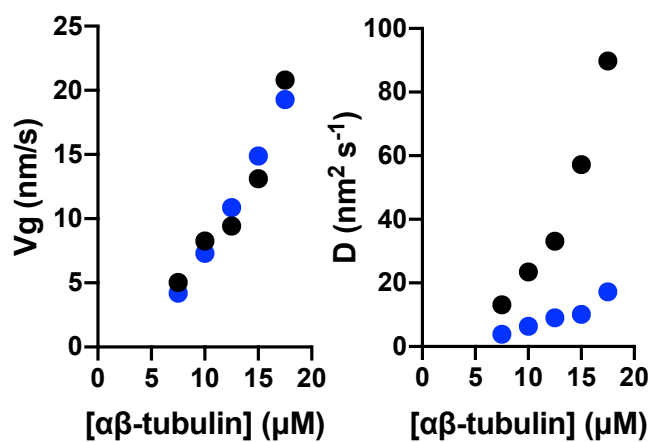

C

Site-dependent association rate:

$$k_{\text{on}}^{\text{Long}} = 1.7 * k_{\text{on}}^{\text{Corner}}$$

$$k_{\text{on}}^{\text{Bucket}} = 0.23 * k_{\text{on}}^{\text{Corner}}$$

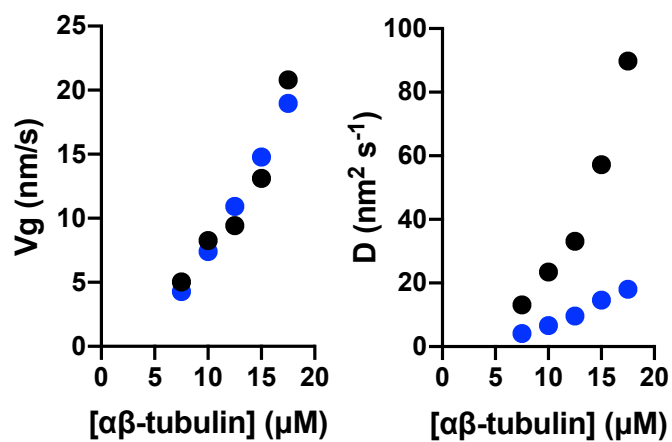

Supplement: supp [file elife_poa_e75931_Figure_4_figure_supplement_1.pdf › elife_poa_e75931_Figure_4_figure_supplement_1.pdf]
