# Supplementary figures and images for: Measurements and simulations of microtubule growth imply strong longitudinal interactions and reveal a role for GDP on the elongating end
Source: eLife journal article supplement (doi:10.7554/elife.75931), 2022-04-14

Figure 1 – figure supplement 1

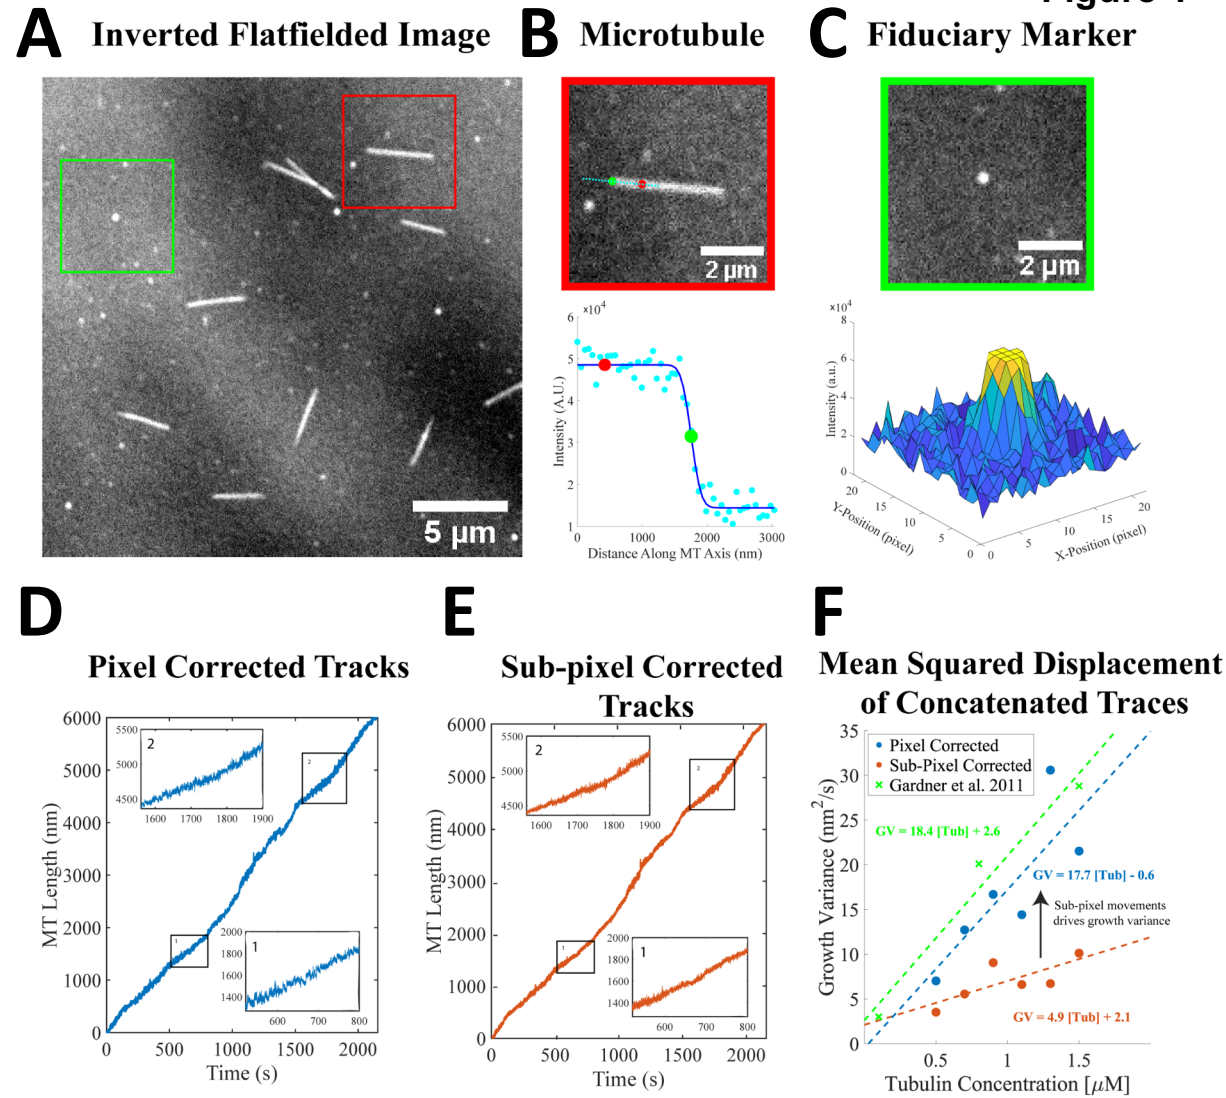

Supplement: supp [file elife_poa_e75931_Figure_1_figure_supplement_1.pdf › elife_poa_e75931_Figure_1_figure_supplement_1.pdf]

Figure 1 – figure supplement 2

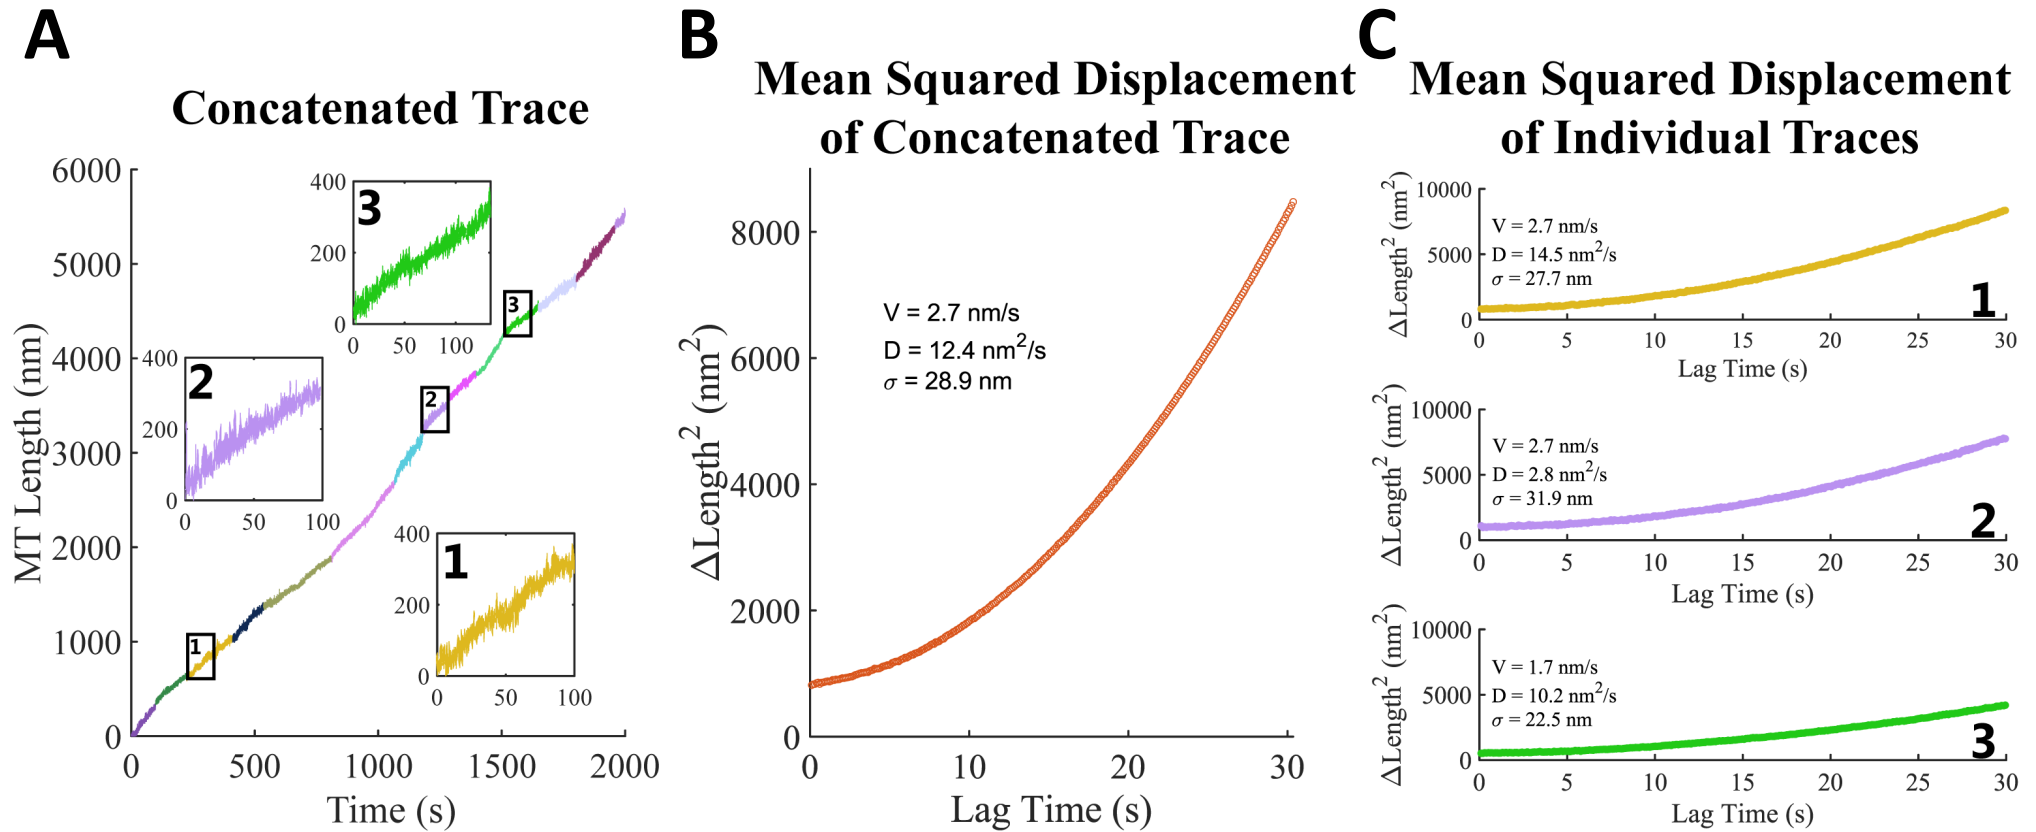

Supplement: supp [file elife_poa_e75931_Figure_1_figure_supplement_2.pdf › elife_poa_e75931_Figure_1_figure_supplement_2.pdf]

Figure 1 – figure supplement 3

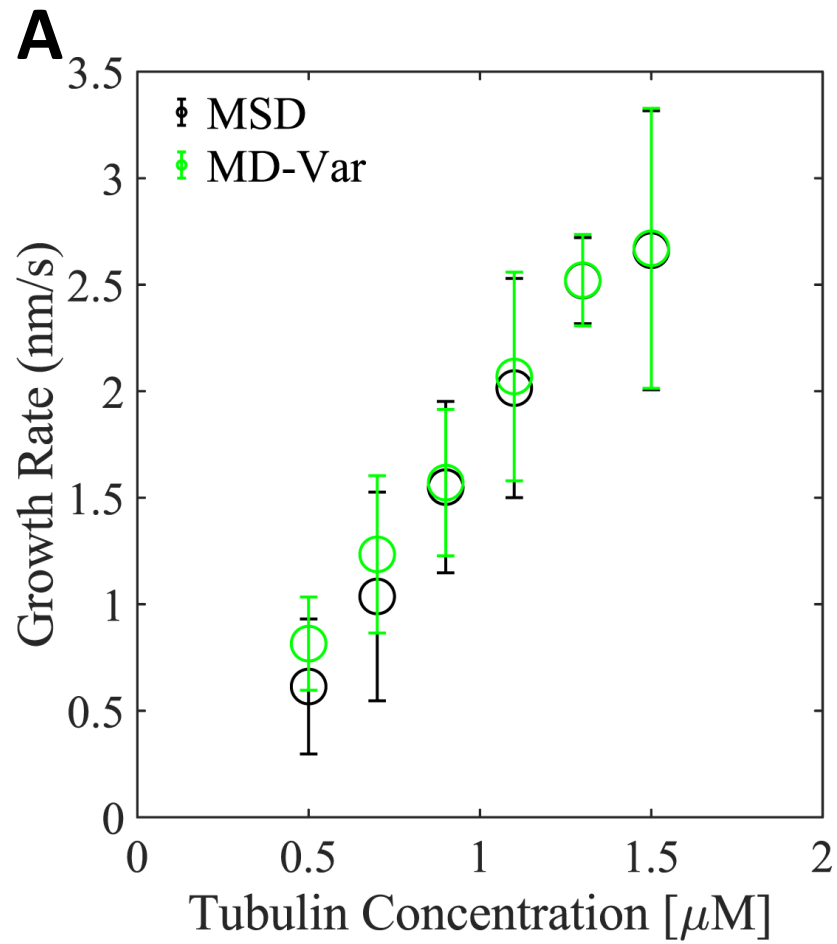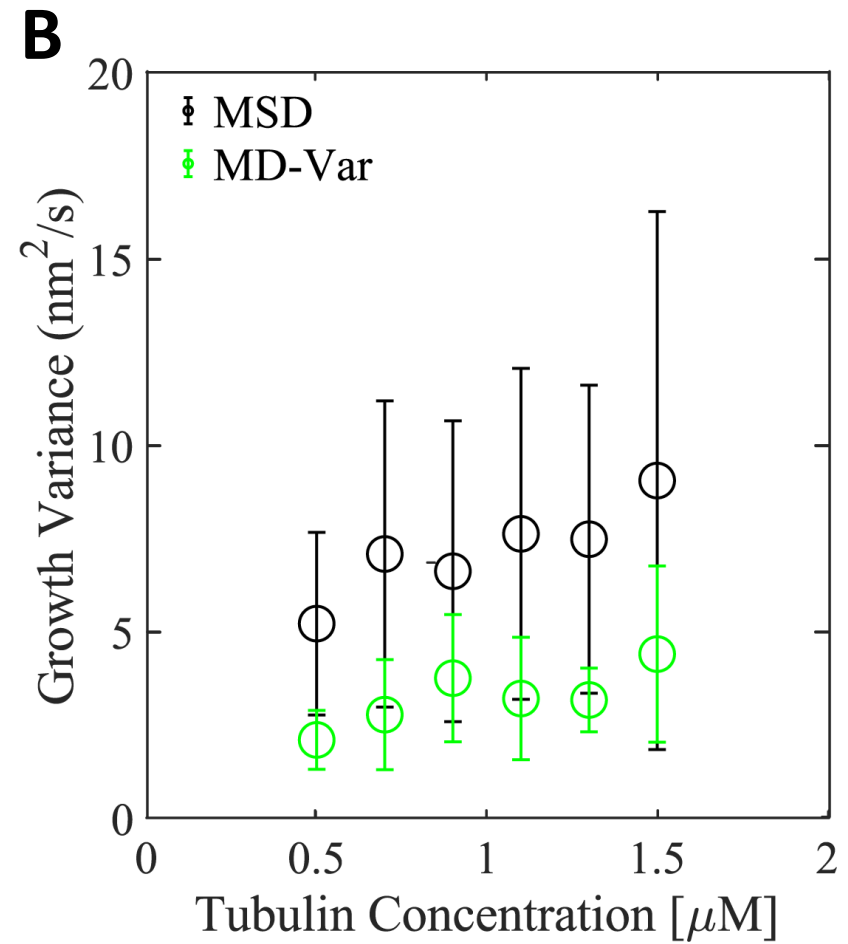

Supplement: supp [file elife_poa_e75931_Figure_1_figure_supplement_3.pdf › elife_poa_e75931_Figure_1_figure_supplement_3.pdf]

**Figure 1 – figure supplement 4**

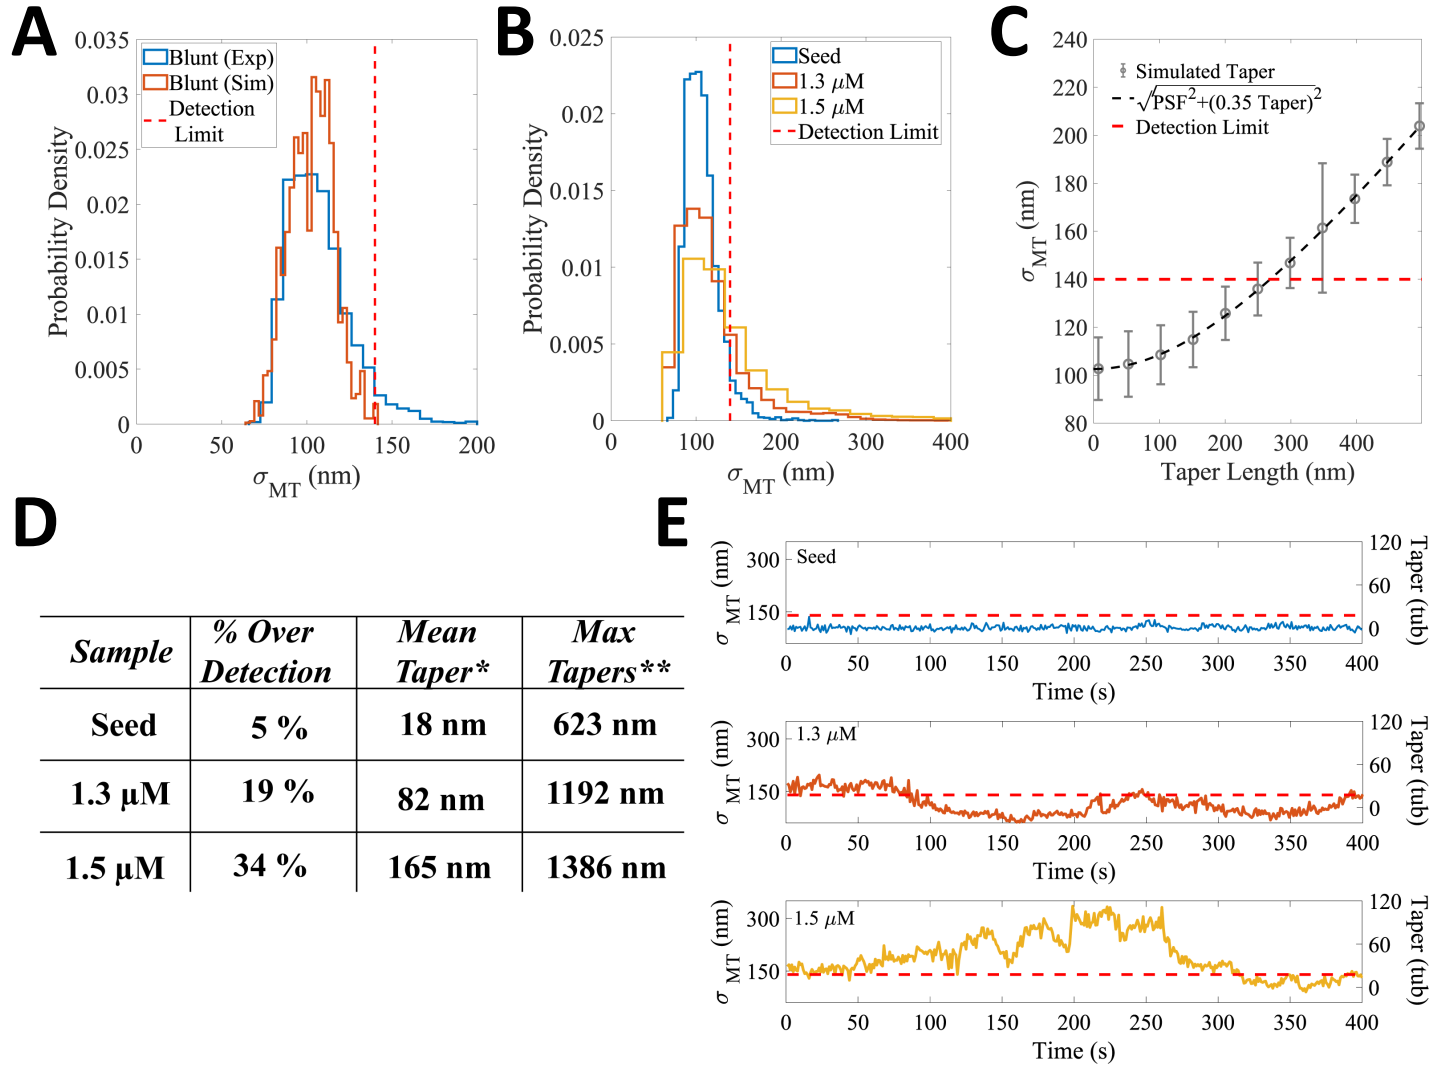

Supplement: supp [file elife_poa_e75931_Figure_1_figure_supplement_4.pdf › elife_poa_e75931_Figure_1_figure_supplement_4.pdf]

**Figure 2 – Figure Supplement 2**

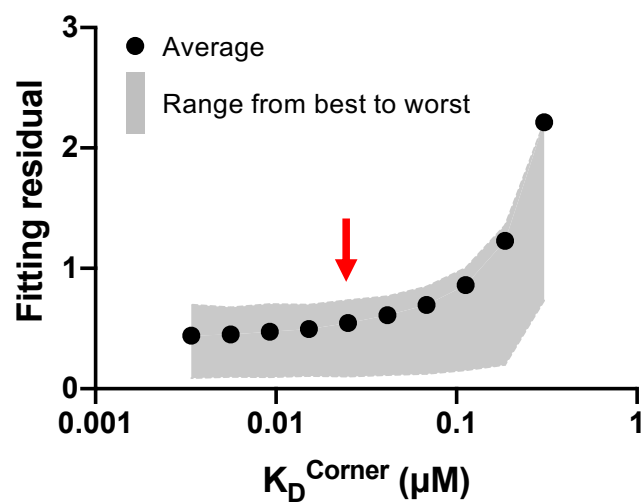

Supplement: supp [file elife_poa_e75931_Figure_2_figure_supplement_2.pdf › elife_poa_e75931_Figure_2_figure_supplement_2.pdf]

Figure 2 – Figure Supplement 3

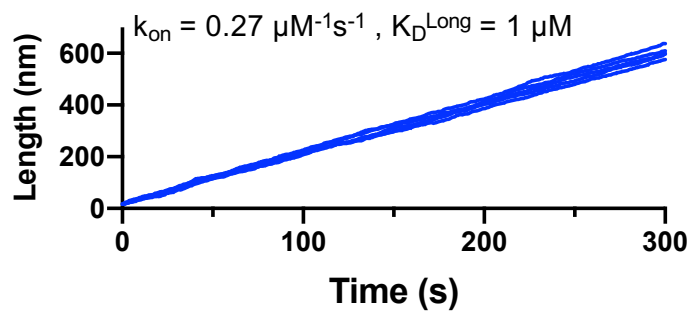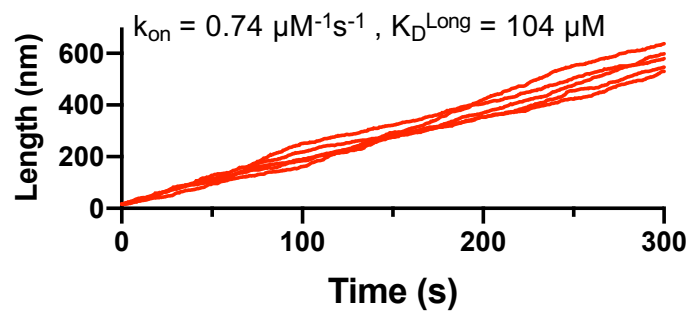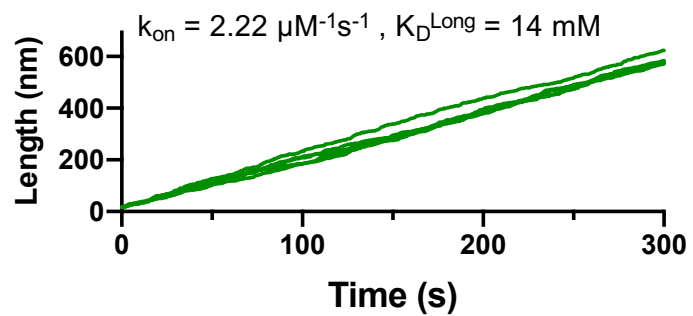

Supplement: supp [file elife_poa_e75931_Figure_2_figure_supplement_3.pdf › elife_poa_e75931_Figure_2_figure_supplement_3.pdf]

Figure 3 – figure supplement 1

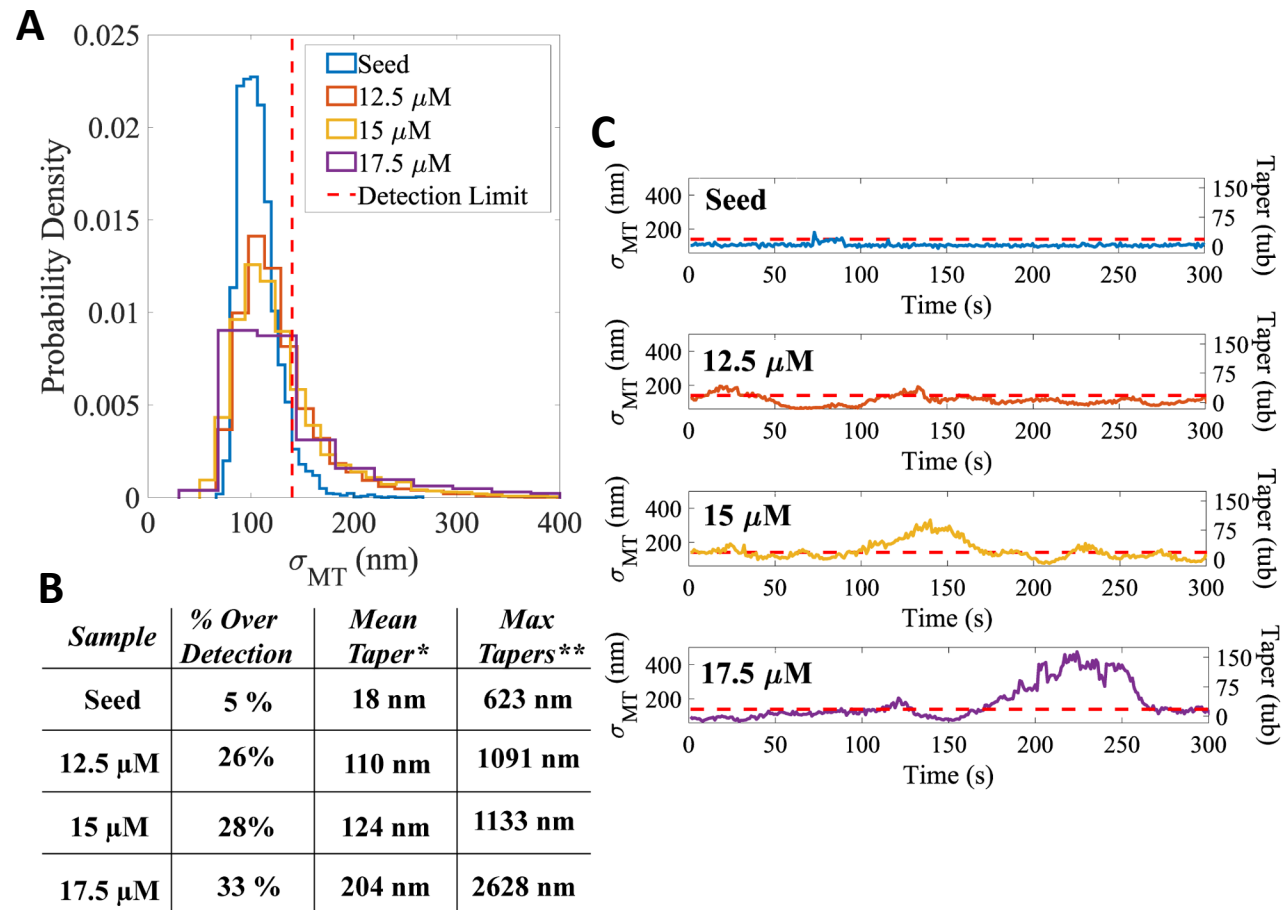

Supplement: supp [file elife_poa_e75931_Figure_3_figure_supplement_1.pdf › elife_poa_e75931_Figure_3_figure_supplement_1.pdf]
